1 **Neuronal hemoglobin induces  $\alpha$ -synuclein cleavage and loss of dopaminergic**  
2 **neurons**

3 Santulli Chiara<sup>1\*</sup>, Bon Carlotta<sup>2\*</sup>, De Cecco Elena<sup>1</sup>, Codrich Marta<sup>1</sup>, Narkiewicz  
4 Joanna<sup>1</sup> Parisse Pietro<sup>3</sup>, Perissinotto Fabio<sup>3</sup>, Claudio Santoro<sup>4</sup>, Francesca  
5 Persichetti<sup>4</sup>, Legname Giuseppe<sup>1</sup>, Stefano Espinoza<sup>2,4#</sup> and Gustincich Stefano<sup>1,2#</sup>

6

7 1. Area of Neuroscience, Scuola Internazionale Superiore di Studi Avanzati  
8 (SISSA), Trieste, Italy.

9 2. Central RNA Laboratory, Istituto Italiano di Tecnologia (IIT), Genova, Italy.

10 3. ELETTRA Synchrotron Light Source, Trieste, Italy.

11 4. Department of Health Sciences and Research Center on Autoimmune and  
12 Allergic Diseases (CAAD), University of Piemonte Orientale (UPO), Novara,  
13 Italy.

14

15 \* equally contributed to the paper

16

17 #Corresponding author:

18 Stefano Gustincich

19 Deputy Director for Life Sciences

20 Director – Central RNA Laboratory

21 Istituto Italiano di Tecnologia (IIT)

22 via Melen 83, Genova (GE) 16152 - Italy

23 Tel: +39-010-71781-447

24 e-mail: [stefano.gustincich@iit.it](mailto:stefano.gustincich@iit.it)

25

26 Correspondence may also be addressed to:

27 Stefano Espinoza

28 Central RNA Laboratory

29 Istituto Italiano di Tecnologia (IIT)

30 via Melen 83, Genova (GE) 16152 – Italy

31 e-mail: [stefano.espinoza@iit.it](mailto:stefano.espinoza@iit.it)

32 **ABSTRACT**

33 **Background**

34  $\alpha$ -synuclein, a protein involved in the pathogenesis of several neurodegenerative  
35 disorders, is subjected to several post-translational modifications. Among them, C-  
36 terminal truncation seems to increase its aggregation propensity *in vitro*. Hemoglobin  
37 is the major protein in erythrocytes to carries oxygen and recently is found to be  
38 expressed in dopaminergic neurons and to be involved in the pathogenesis of  
39 neurodegenerative diseases such as Parkinson's disease.

40 **Methods**

41 To assess the role of hemoglobin in  $\alpha$ -synuclein post-translational modification and in  
42 dopamine cells physiology, we over-expressed  $\alpha$  and  $\beta$ -chains of Hb in iMN9D  
43 dopamine cells to evaluate its effect on  $\alpha$ -synuclein truncation. Using an AAV9 we  
44 expressed  $\alpha$  and  $\beta$ -chains of hemoglobin in dopamine neurons of Substantia Nigra  
45 pars compacta and evaluate its effect on  $\alpha$ -synuclein post-translational modification,  
46 dopamine neurons survivals and behavioural outcome.

47 **Results**

48 The over-expression of  $\alpha$  and  $\beta$ -chains of hemoglobin in iMN9D dopamine cells  
49 increased C-terminal truncation of  $\alpha$ -synuclein when cells were treated with  $\alpha$ -  
50 synuclein preformed fibrils. This cleavage was led at least in part by Calpain protease.  
51 Hemoglobin over-expression in Substantia Nigra pars compacta induced a similar  
52 pattern of  $\alpha$ -synuclein truncation and a decrease in tyrosine hydroxylase expression,  
53 unveiling a decrease of dopamine neurons of about 50%. This dopamine cells loss led  
54 to a mild motor impairment and a deficit in recognition and spatial working memory.

55 **Conclusion**

56 Our study reveals a novel role for hemoglobin in  $\alpha$ -synuclein post-translational  
57 modification and in dopamine neurons homeostasis suggesting neuronal hemoglobin  
58 is an important modifier in synucleinopathies such as Parkinson's disease.

59 **KEYWORDS**

60  $\alpha$ -synuclein; synucleinopathies; hemoglobin; Parkinson's disease.

## 61 BACKGROUND

62  $\alpha$ -synuclein ( $\alpha$ -syn) is a 140-amino acid protein predominantly located at pre-synaptic  
63 terminals in association with synaptic vesicles. The regulatory role of  $\alpha$ -syn in vesicle  
64 trafficking (1) is believed to be its main physiological function. However, it is also  
65 implicated in synaptic maintenance and SNARE protein assembly (2, 3).

66  $\alpha$ -syn can undergoes misfolding as monomers may tend to assume a pathologic  $\beta$ -  
67 sheet conformation, leading to the formation of amyloid assemblies, also known as  
68 amyloid seeds (4). The spreading within and between neuronal and glial cells occurs  
69 via a prion-like recruitment of endogenous protein into further pathologic forms.  
70 Indeed, *in vitro* and *in vivo* models corroborate the prion-like “conformational  
71 templating” through the exposure of preformed  $\alpha$ -syn fibril seeds to monomers (Ms)  
72 that induce fibril elongation triggering aggregation (5-7).

73 In addition, pathologic  $\alpha$ -syn present several post-translational modifications (PTMs)  
74 among which, phosphorylation at serine 129 (pSer-129) and truncations are the most  
75 abundant within the inclusions (8, 9). *In vitro*, C-terminal truncation potentiate the  
76 aggregation propensity of C-terminal truncated species ( $\Delta$ C- $\alpha$ -syn) into toxic fibrils  
77 with an increased prion-like seeding activity as compared with the full-length (FL- $\alpha$ -  
78 syn) (4, 6, 10, 11).

79 Misfolding of this protein and consequent pathological inclusion formation is a hallmark  
80 of the class of neurodegenerative diseases termed synucleinopathies (12), which  
81 includes Parkinson’s Disease (PD), Lewy Body Dementia (LBD) and Multiple System  
82 Atrophy (MSA). PD and LBD are pathologically characterized by neuronal Lewy Body  
83 (LB) inclusions observed in the intracellular spaces of *Substantia Nigra pars compacta*  
84 (SNpc) neurons and composed of amyloidogenic  $\alpha$ -syn of which 10—30% of total is  
85 C-terminal truncated (13, 14). Instead, MSA is characterised by  $\alpha$ -syn-containing glial  
86 cytoplasmic inclusions (GCIs) within the oligodendrocytes (15). The formation and the  
87 continued presence of  $\alpha$ -syn oligomers and fibrils is causative of neuronal and glial  
88 toxicity. Along with LB inclusions, PD present selective degeneration of A9  
89 dopaminergic (DA) neurons of SNpc.

90 Gene expression profiling of A9 DA neurons revealed the expression of hemoglobin  
91 (Hb)  $\alpha$  and  $\beta$ -chain (16-18). Although the main functions of neuronal Hb (nHb) in the  
92 brain remains unclear, there is evidence that it has a role in mitochondrial

93 homeostasis. nHb has been found to constitute complexes with  $\alpha$ -syn (nHb <sup>$\alpha$ -syn</sup>) in  
94 neuronal tissue (19), consistently supported by nHb-forming insoluble aggregates  
95 found in the nucleolus of DA neurons as well as in PD post-mortem brains (18). In the  
96 SNpc, nHb <sup>$\alpha$ -syn</sup> increase in an age-dependent manner in the cytoplasm, reducing the  
97 mitochondrial fraction of free nHb (20) and therefore contribute to an imbalance in  
98 mitochondrial homeostasis. Hb overexpression alter gene expression modulating  
99 transcript levels of genes involved in oxygen homeostasis and oxidative  
100 phosphorylation. The resulting oxidative stress induce iron release from heme  
101 promoting mitochondrial dysfunction,  $\alpha$ -syn aggregation, and neuronal cell death (21-  
102 23). Hb overexpression increases the susceptibility to both MPP<sup>+</sup> (1-methyl-4-  
103 phenylpyridinium) and rotenone *in vitro*, increasing nucleolar stress and inhibiting  
104 autophagy induced by neurochemical insults (17). Overall, this evidence indicates nHb  
105 as major player to DA cells' dysfunction in PD.

106 Here, we show that Hb increases  $\alpha$ -syn truncation *in vitro* and *in vivo* and that Hb  
107 expression in SNpc induces a loss of DA neurons and motor and cognitive  
108 impairments.

## 109 MATERIAL AND METHODS

### 110 Production of recombinant human $\alpha$ -synuclein

111 Expression and purification of human  $\alpha$ -syn were performed as previously describe  
112 (24). Briefly,  $\alpha$ -syn gene was cloned in pET-11a vector and expressed in *E.coli*  
113 BL21(DE3) strain. Cells were grown in Luria-Bertani medium at 37°C and expression  
114 of  $\alpha$ -syn was induced by addition of 0.6 mM isopropyl- $\beta$ -D-thiogalactoside (IPTG)  
115 followed by incubation at 37°C for 5 hours. The protein was extracted and purified  
116 according to Huang *et al.* (25).

### 117 Fibrillation of human $\alpha$ -synuclein

118 Lyophilized human  $\alpha$ -syn was re-suspended in ddH<sub>2</sub>O, filtered with a 0,22  $\mu$ m syringe  
119 filter and the concentration was determined by absorbance measured at 280 nm.  
120 Fibrillization reactions were carried out in a 96-well plate (Perkin Elmer) in the  
121 presence of a glass bead (3 mm diameter, Sigma) in a final reaction volume of 200  
122  $\mu$ L. Human  $\alpha$ -syn (1.5 mg/ml) was incubated in the presence of 100 mM NaCl, 20 mM  
123 TrisHCl pH 7.4 and 10  $\mu$ M thioflavin T (ThT). Plates were sealed and incubated in

124 BMG FLUOstar Omega plat reader at 37°C with cycles of 50 seconds shaking (400  
125 rpm) and 10 seconds rest. Formation of fibrils was monitored by measuring the  
126 fluorescence of ThT (excitation: 450 nm, emission: 480 nm) every 15 minutes. After  
127 reaching the plateau phase, the reactions were stopped. Fibrils were collected,  
128 centrifuged at 100000g for 1 hour, resuspended in sterile PBS and stored at -80°C for  
129 further use. For cell culture experiments, the fibrillation reaction was carried out without  
130 ThT and PFFs in 0,5 ml conical plastic tubes were sonicated for 5 minutes in a Branson  
131 2510 Ultrasonic Cleaner prior addition to cell culture medium.

### 132 **Cleaning procedures**

133 For fibrils inactivation, all contaminated surfaces and laboratory wares, both reusable  
134 and disposable, were cleaned using a 1 % SDS solution prior washing with Milli-Q  
135 water according to Bousset *et al.* (26).

### 136 **Atomic Force Microscopy**

137 Atomic Force Microscopy (AFM) was performed as previously described (27). Briefly,  
138 three to five µl of fibril solution was deposited onto a freshly cleaved mica surface and  
139 left to adhere for 30 minutes. Samples were then washed with distilled water and blow-  
140 dried under a flow of nitrogen. Images were collected at a line scan rate of 0.5-2 Hz in  
141 ambient conditions. The AFM free oscillation amplitudes ranged from 25 nm to 40 nm,  
142 with characteristic set points ranging from 75% to 90% of these free oscillation  
143 amplitudes.

### 144 **Cell line**

145 MN9D-Nurr1<sup>Tet-on</sup> (iMN9D) cell line stably transfected with pBUD-IRES-eGFP (CTRL  
146 cells) or with pBUD-β-globin-MYC IRES-eGFP, 2xFLAG-α-globin (Hb cells) were used  
147 (16). Cells were maintained in culture at 37 °C in a humidified CO<sub>2</sub> incubator with  
148 DMEM/F12 medium (Gibco by Life Technologies, DMEM GlutaMAX® Supplement  
149 Cat. No. 31966-021; F-12 Nutrient Mix GlutaMAX® Supplement Cat. No. 31765-027)  
150 supplemented with 10% fetal bovine serum (Euroclone, Cat. No. ECS0180L), 100  
151 µg/ml penicillin (Sigma–Aldrich), 100 µg/ml streptomycin (Sigma-Aldrich). 300 µg/ml  
152 neomycin (Gibco by Life Technologies, Cat. No 11811-031) and 150 µg/ml zeocyn  
153 (Invivogen, Cat. No. ant-zn-05) were used for selection.

## 154 **Exposure of iMN9D cells to $\alpha$ -syn monomers and fibrils**

155 iMN9D cells were exposed to 2  $\mu$ M of  $\alpha$ -syn species (2  $\mu$ M equivalent monomer  
156 concentration in the case of amyloids) in cell culture media for 24, 48, 96 hours before  
157 collection.

158 For western blot analysis cells were plated in 6 well-plate ( $6 \times 10^5$  cells/plate for 24h  
159 collection,  $3 \times 10^5$  cells/plate for 48h collection,  $2 \times 10^5$  cells/plate for 96h collection).  
160 Additionally, at 96 hours cells were split and maintained for three additional days  
161 before collection as Passage 1 (P1). Cells treated with vehicle were used as control  
162 (Untreated).

163 For immunocytochemistry, cells were cultured in 12-well plates with coverslips ( $3 \times 10^5$   
164 cells/well for 24h collection,  $1.5 \times 10^5$  cells/well for 48h collection,  $1 \times 10^5$  cells/well for  
165 96h collection).

166 For MTT analysis, cells were cultured in 96-well plates ( $4 \times 10^4$  cells/well for 24h  
167 collection,  $2 \times 10^4$  cells/well for 48h collection,  $1 \times 10^4$  cells/well for 96h collection).

## 168 **MTT analysis**

169 Cell viability was assayed using Thiazolyl Blue Tetrazolium Bromide (MTT, Sigma–  
170 Aldrich, M5655) following the manufacturer's instructions. Briefly, 20  $\mu$ l of MTT solution  
171 (5 mg/ml in PBS) were added to each well and incubated at 37°C for 4 h. The medium  
172 was then removed and replaced with 200  $\mu$ l DMSO. Plates were shaken before  
173 absorbance measurements. Absorbance was measured at 550 nm wavelength using  
174 a microplate ELISA reader (Thermo Scientific).

## 175 **Western Blot**

176 iMN9D cells were washed 2 times with D-PBS and lysed in 300  $\mu$ l SDS sample buffer  
177 2X (6 well-plate), briefly sonicated, boiled and 10  $\mu$ l/sample loaded on 15 % or 8 %  
178 (for Spectrin  $\alpha$  II immunoblot) SDS-PAGE gel. For antibodies validation, cells were  
179 lysed in cold lysis buffer (10 mM Tris-HCl pH 8, 150 mM NaCl, 0.5% Igepal CA-630,  
180 0.5% sodium deoxycholate) supplemented protease inhibitor mixture (Roche  
181 Diagnostics, COEDTAF-RO). Lysates were incubated for 30 minutes at 4 °C on rotator  
182 and cleared at 12000xg for 20 minutes at 4 °C. Supernatants were transferred in new  
183 tubes and total protein content was measured using bicinchoninic acid protein (BCA)  
184 quantification kit (Pierce) following the manufacturer's instructions. For SNpc lysates,  
6

185 dissected brain area was lysed in cold RIPA buffer and centrifuged for 10 minutes at  
186 17,000xg. Sample buffer was added to the supernatant and boiled at 95°C for 5  
187 minutes and 30 µg of proteins were loaded on a 10% SDS-PAGE gel. Proteins were  
188 transferred to nitrocellulose membrane (Amersham™, Cat. No. GEH10600001) for  
189 1:30 hour at 100V or 16 hours 20V (only for Spectrin α II immunoblot). Membranes  
190 were blocked with 5% non-fat milk or 5% BSA (only for Spectrin α II immunoblot) in  
191 TBST solution (TBS and 0.1% Tween20) for 40 minutes at room temperature.  
192 Membranes were then incubated with primary antibodies at room temperature for 2 h  
193 or overnight at 4 °C (only for Spectrin α II immunoblot). The following antibodies were  
194 used: anti-FLAG 1:2000 (Sigma–Aldrich, F3165), anti-MYC 1:2000 (Cell Signaling,  
195 2276), anti-β-actin 1:5000 (Sigma–Aldrich, A5441), anti-Hemoglobin 1:1000 (Cappel,  
196 MP Biomedicals, 55039) and anti-GFP 1:1000 (Clontech, 632380), anti-α-syn 1:1000  
197 (C-20) (Santa Cruz Biotechnology, sc-7011-R), anti-α-syn 1:1000 (SYN-1) (BD  
198 Transduction Laboratories, 610787), anti-biotin-HRP (Jackson ImmunoResearch  
199 Laboratories), anti-Spectrin α II 1:1000 (Santa Cruz, Cat. No. sc-46696), anti-TH  
200 1:1000 (Millipore). For development, membranes were incubated with secondary  
201 antibodies conjugated with horseradish peroxidase (Dako) for 1 hour at room  
202 temperature. For IP and pulldown experiments, membranes were incubated with  
203 Protein A antibody conjugated with horseradish peroxidase for 1 hour at room  
204 temperature. Proteins of interest were visualized with the Amersham ECL Detection  
205 Reagents (GE Healthcare by SIGMA, Cat. No. RPN2105) or LiteAblot TURBO Extra-  
206 Sensitive Chemiluminescent Substrate (EuroClone, Cat. No. EMP012001). Western  
207 blotting images were acquired using with Alliance LD2-77WL system (Uvitec,  
208 Cambridge) and band intensity was measured UVI-1D software (Uvitec, Cambridge).

### 209 **Antibodies validation for quantitative western blot**

210 For antibodies validation, cells were lysed in cold lysis buffer (10 mM TrisHCl pH 8,  
211 150 mM NaCl, 0.5% Igepal CA-630, 0.5% sodium deoxycholate) supplemented with  
212 protease inhibitor mixture (Roche Diagnostics, COEDTAF-RO). Lysates were  
213 incubated for 30 min at 4°C on rotator and cleared at 12000 g for 20 min at 4°C.  
214 Supernatants were transferred in new tubes and total protein content was measured  
215 using bicinchoninic acid protein (BCA) quantification kit (Pierce) following the

216 manufacturer's instructions.

### 217 **Pull-down assay of biotinylated fibrils**

218 For pulldown experiments,  $\alpha$ -syn PFFs were biotinylated following the manufacturer's  
219 instructions (Sigma-Aldrich). iMN9D cells were lysed in cold immunoprecipitation (IP)  
220 buffer (50 mM Tris HCl pH 8, 150 mM NaCl, 0.1% Igepal CA-630) containing protease  
221 inhibitors (Roche Diagnostics, COEDTAF-RO). Following 30 min incubation at 4 °C on  
222 rotator, lysates were cleared at 12000 g for 20 min and incubated with biotinylated  
223 fibrils overnight at 4°C on rotator. Biotinylated fibrils were pulled down by binding to  
224 NeutrAvidin Agarose Resin (Pierce, 29200). After 4 h incubation at 4 °C, the resin-  
225 bound complexes were washed three times with IP buffer and eluted with SDS sample  
226 buffer 2X, boiled at 95°C for 5 min and analysed by western blot.

### 227 **Cathepsin D and Calpain inhibitors treatment**

228 Pepstatin (Pep, Cathepsin D inhibitor, MedChem Express Cat. No. HY-P0018) and  
229 Calpain inhibitor III (Santa Cruz Cat. No. SC-201301) were dissolved in  
230 dimethylsulfoxide (DMSO) and diluted in cell culture medium to a final concentration  
231 respectively of 100  $\mu$ M and 10  $\mu$ M. Hb cells were treated with vehicle (DMSO), Calpain  
232 inhibitor III and Pepstatin A at the indicated concentrations for 24 h. Medium was then  
233 removed and replaced with new one containing  $\alpha$ -syn amyloids, as previously  
234 reported, and protease inhibitors to a final concentration respectively of 100  $\mu$ M and  
235 10  $\mu$ M, as the day before. Cells were collected at the indicated time points for western  
236 blot analysis. Immunoblot of Spectrin  $\alpha$  II was used to monitor Calpain inhibitor activity,  
237 while Cathepsin D activity kit was uses to monitor Cathepsin D activity.

### 238 **Cathepsin D activity assay**

239 Cathepsin D (CatD) activity measurements were performed using the Cathepsin D  
240 activity assay kit (BioVision, Cat. N. K143) following manufacturer's instructions.  
241 Briefly, cells were washed twice with PBS, collected in culture media and pelleted by  
242 centrifugation at 500 g for 5 min. Cells were counted and  $1 \times 10^5$  cells/well were used.  
243 Cells were washed once with PBS, pelleted again by centrifugation at 500 g for 5 min  
244 and lysed in CD Cell Lysis Buffer incubating samples for 10 min on ice. Cells were  
245 then centrifuged at maximum speed for 10 min. As control, untreated cells were



246 incubated with PepA (100  $\mu$ M final concentration) at 37°C for 10 min prior addition of  
247 Reaction Buffer and CD substrate (Positive control). The reaction was left to proceed  
248 at 37°C for 1:30 h in the dark. Fluorescence was read using Thermo Scientific  
249 Varioskan® Flash with a 328-nm excitation filter and 460-nm emission filter. CD  
250 activity in relative fluorescence units (RFU) was then normalized to Hb cells treated  
251 with vehicle and indicated as % Activity. Each sample was measured in duplicate and  
252 measurements were repeated two times.

### 253 **RNA isolation, Reverse Transcription (RT) and quantitative RT-PCR (qRT-PCR)**

254 Total RNA was extracted using TRIzol Reagent (Thermo Fisher, 15596026) and  
255 following manufacturer's instructions. RNA samples were subjected to TURBO DNase  
256 (Invitrogen, Cat. No. AM1907) treatment, to avoid DNA contamination. The final quality  
257 of RNA sample was tested on 1 % agarose gel with formaldehyde. A total of 1  $\mu$ g of  
258 RNA was subjected to retrotranscription using iScript™cDNA Synthesis Kit (Bio-Rad,  
259 Cat. No. 1708890), according to manufacturer's instructions. qRT-PCR was carried  
260 out using SYBR green fluorescent dye (iQ SYBR Green Super Mix, Bio-Rad, Cat. No.  
261 1708884) and an iCycler IQ Real time PCR System (Bio-Rad). The reactions were  
262 performed on diluted cDNA (1:2). Mouse actin was used as normalizing control in all  
263 qRT-PCR experiments. The amplified transcripts were quantified using the  
264 comparative Ct method and the differences in gene expression were presented as  
265 normalized fold expression with  $\Delta\Delta$ Ct method [36, 37]. The following primer pairs were  
266 used:

267  $\beta$ -actin: fwd CACACCCGCCACCAGTTC, rev CCCATTCCCACCATCACACC;  
268 Capn1: fwd TTGACCTGGACAAGTCTGGC, rev CCGAGTAGCGGGTGATTATG;  
269 Capn2: fwd ATGCGGAAAGCACTGGAAG, rev GACCAAACACCGCACAAAAT;  
270 Ctsd: fwd CAGGACACTGTATCGGTTCCA, rev CAAAGACCGGAAGCACGTTG.

### 271 **Animals**

272 All animal experiments were performed in accordance with European guidelines for  
273 animal care and following Italian Board Health permissions (D.Lgs. 26/2014, 4 March  
274 2014). Mice were housed and bred in IIT – Istituto Italiano della Tecnologia (Genova,  
275 GE, Italy) animal facility, with 12 hours dark/night cycles and controlled temperature  
276 and humidity. Food and water were provided *ad libitum*.

277 **Behavioral testing**

278 All procedures involving animals and their care were carried out in accordance with  
279 the guidelines established by the European Community Council (Directive 2010/63/EU  
280 of September 22, 2010) and were approved by the Italian Ministry of Health (DL  
281 116/92; DL 111/94-B)

282 **Locomotor activity**

283 To measure spontaneous locomotor activity WT mice injected with AAV9 were placed  
284 in the locomotor activity chambers (Omnitech Digiscan, Accuscan Instruments,  
285 Columbus, OH, USA) for 60 minutes and total distance travelled was measured by  
286 analyzing infrared beam interruptions.

287 **Rotarod**

288 For this test we used a Rotarod from TSE Systems. Briefly, mice are handled on  
289 alternate days during the week preceding the start of the Rotarod test (3 handling  
290 sessions; 1 min per mouse per session). Behavioral testing lasts two days. On day 1,  
291 in the morning, mice are habituated to rotation on the rod under a constant speed of 4  
292 rpm for three trials (60-s inter-trial interval). Trial ends when mice fall off the rod or until  
293 they are able to stay on the rod for 300 s. In the afternoon, the test starts by placing  
294 the mice on the rod and beginning rotation at constant 4 rpm-speed for 60 seconds.  
295 Then the accelerating program is launched for three trials (60-s inter-trial interval) and  
296 trial ends when mice fall off the rod or until they are able to stay on the rod for 300 s.  
297 Time stayed on the rod was automatically recorded. Mice are tested for two  
298 consecutive days (only with the “afternoon program”). The average time spent on the  
299 rod is calculated.

300 **Static rods**

301 Five wooden rods of varying thickness (35, 25, 15, 10 and 8 mm diameter) each 60  
302 cm long are fixed to a laboratory shelf such that the rods horizontally protrude into  
303 space. The height of the rods above the floor is 60 cm. Mice were placed at the far  
304 end of the widest rod, with the orientation of the mouse outward. Two measures are  
305 considered: orientation time (time taken to orientate 180° from the starting position  
306 towards the shelf) and transit time (the time taken to travel to the shelf end). Orientation

307 is dependent on the mouse staying upright. If it turns upside down and clings below  
308 the rod, it is assigned the maximum orientation score of 120 sec. If, after orienting, the  
309 mouse falls or it reaches the maximum test time (arbitrarily set at 120 sec) mice are  
310 not tested on smaller rods. After testing on one rod mice are placed back to the home  
311 cage to rest while other mice are tested. This procedure is repeated for all the rods. If  
312 the mouse fall off the rod within 5 seconds, it is replaced to allow another attempt (as  
313 falling within 5 sec could be due to faulty placing by the experimenter), for a maximum  
314 of three trials, and the best result is considered. The time for orientation and transit  
315 are plotted in the graphs for statistical analysis. Since in smaller rods many of the mice  
316 fall or do not complete the test (with the time of 120 sec assignment), the success rate  
317 of the test is also calculated as the number of mice that complete the test and the Chi-  
318 square test is used to compare the two groups of mice.

### 319 **Horizontal bars**

320 For this test two bars made of brass are used, 40 cm long, held 50 cm above the bench  
321 surface by a wooden support column at each end. Two bar diameters are available: 2  
322 and 4mm. The 2 mm bar is the standard one and more simple for the mice to stay  
323 attached on with the forepaw. The larger diameter bar is more difficult since the mice  
324 cannot grip those so well. The operator take the mouse by the tail, place it on the  
325 bench in front of the apparatus, slide it quickly backwards about 20 cm (this aligns it  
326 perpendicular to the bar), rapidly raise it and let it grasp the horizontal bar at the central  
327 point with its forepaws only, and release the tail, simultaneously starting the clock. The  
328 time to reach one of the end columns of the bar is calculated. The maximum test time  
329 (cut-off time) is 30 sec. If the mouse fails to grasp the bar properly first time or fall  
330 within 5 sec, the score is not recorded, the mouse is placed back to the cage to rest  
331 and then the trial is repeat up to three times since it may be a poor placement of the  
332 operator. The best score is taken out of these trials. The score is calculated as an  
333 average of the scores of the 2mm and 4 mm bar trials as calculated below:

334 Falling between 1-5 sec = 1

335 Falling between 6-10 sec = 2

336 Falling between 11-20 sec = 3

337 Falling between 21-30 sec = 4

338 Falling after 30 sec = 5

339 The maximum score for completing the test is 5 for each bar and 10 for both bars.

#### 340 **Novel object recognition test**

341 Mice are handled on alternate days during the week preceding the start of the test (3  
342 handling sessions; 1 min per mouse per session on Day 1, 3, 5.). On day 6, mice were  
343 subjected to the habituation session in the empty open field for 1 hour. The intensity  
344 of the light on the apparatus is of about 60 lux. On day 7, each mouse is subjected to  
345 two successive sessions (one acquisition session and one retention trial at 1 hour  
346 later). Pre-test session (acquisition trial): each mouse is introduced into the open field  
347 containing two identical copies of the same object for 10 minutes. At the end of the  
348 session the mouse was returned into the home cage. II session (retention trial): after  
349 1 hour from the acquisition trial, both objects were substituted, one with a third copy  
350 of previous object and the other with a new object. This session lasted 5 minutes. The  
351 animals are considered to be exploring the object when the head of the animal is facing  
352 the object (at a distance < 1 cm) or the animal is touching or sniffing the object. Mice  
353 that explored object for <4 sec are excluded. The type of the objects and their positions  
354 of presentation during acquisition and retention phase are counterbalanced across  
355 animals. A preference index, a ratio of the amount of time spent exploring any one of  
356 the objects (training session) or the novel one (retention session) over the total time  
357 spent exploring both objects, is used to measure recognition memory. In the pre-test  
358 session is counted the total amount of exploration (in sec) for the identical objects and  
359 to verify that there is no preference for one of the two side of the chamber where the  
360 objects are located.

#### 361 **Y-maze Spontaneous Alternation Test**

362 The apparatus use is a Y-shaped maze with three opaque arms spaced 120° apart  
363 with a measure of 40 x 8 x 15cm each. An overhead camera is mounted to ceiling  
364 directly above apparatus to monitor mice movement and 4 standing lamps with white  
365 light bulbs are placed at corners outside privacy blinds pointed away from apparatus.  
366 The arms are labeled as A, B or C to identify the entries. The animal is placed just  
367 inside arm B facing away from center and allowed to move through apparatus for 10  
368 minutes while being monitored by automated tracking system. Trial begins

369 immediately and ends when defined duration has elapsed. Scoring consists of  
370 recording each arm entry (defined as all four paws entering arm). The total entries in  
371 all arms is recorded. A spontaneous alternation occurs when a mouse enters a  
372 different arm of the maze in each of 3 consecutive arm entries. Spontaneous  
373 alternation % is then calculated as  $((\# \text{spontaneous alternation} / (\text{total number of arm}$   
374  $\text{entries} - 2)) \times 100$ .

### 375 **Stereotaxy AAV9 injection**

376 Adult (12 weeks old) male C57Bl/6J mice were used for experiments. Mice were  
377 anesthetized by a mixture of Isoflurane/Oxygen and placed on a stereotaxic apparatus  
378 (David Kopf instrument, Tujunga, CA, USA) with mouse adaptor and lateral ear bars.  
379 The skin on the skull was cut and one hole was made on the same side by a surgical  
380 drill. A stereotaxic injection of 1  $\mu\text{l}$  of viral vector suspension (AAV9-CTRL or a mixture  
381 of AAV9-2xFLAG- $\alpha$ -globin and AAV9- $\beta$ -globin-MYC, called AAV9-Hb; titer:  $- 5 \times 10^{12}$   
382  $\text{vg/ml}$ ) was delivered bilaterally to SNpc at the following coordinates: anterior/posterior  
383 (A/P)  $-3.2$  mm from bregma, medio/lateral (M/L)  $-1.2$  mm from bregma and  
384 dorso/ventral (D/V)  $- 4.5$  mm from the dura. The coordinates were calculated  
385 according to the Franklin and Paxinos Stereotaxic Mouse Atlases. Injection rate was 1  
386  $\mu\text{l} / 15$  minutes using a glass gauge needle. After the infusion, the needle was  
387 maintained for another 1 minute in the same position and then retracted slowly.

### 388 **Tissue collection and processing**

389 At 10 months after injection of AAVs into SNpc, the animals were sacrificed. Following  
390 induction of deep anaesthesia with an overdose of a mixture of Xylazina and Zoletil,  
391 the animals were intensively perfused transcardially with PBS 1 x. For biochemical  
392 analysis, SNpc was dissected and immediately frozen in liquid nitrogen and stored at  
393  $-80$  °C, pending analyses. For immunohistochemical analysis, after the intensively  
394 transcardially perfusion with PBS 1X, animals were perfused with 4%  
395 paraformaldehyde diluted in PBS 1X. Brains were postfixed in 4% paraformaldehyde  
396 for 1 h at 4 °C. The regions containing the SN were cut in 40  $\mu\text{m}$  free-floating slides  
397 with a vibratome (Vibratome Series 1000 Sectioning System, Technical Products  
398 International, St. Louis, MO, USA). Four consecutive series were collected in order to  
399 represent the whole area of interest.

## 400 **Immunocytochemistry**

401 Cells were washed two times with D-PBS, fixed in 4% paraformaldehyde for 20  
402 minutes, washed two times with PBS 1X and treated with 0.1M glycine for 4 minutes  
403 in PBS 1X, washed two times and permeabilized with 0.1% Triton X-100 in PBS 1X  
404 for 4 minutes. Cells were then incubated in blocking solution (0.2% BSA, 1% NGS,  
405 0.1% Triton X-100 in PBS 1X), followed by incubation with primary antibodies diluted  
406 in blocking solution for 2:30 hours at room temperature. After two washes in PBS 1X,  
407 cells were incubated with labelled secondary antibodies and 1µg/ml DAPI (for nuclear  
408 staining) for 60 minutes. Cells were washed twice in PBS 1X and once in Milli-Q water  
409 and mounted with Vectashield mounting medium (Vector Lab, H-1000). The following  
410 antibodies were used: anti-FLAG 1:100 (Sigma–Aldrich, F7425), anti-MYC 1:250 (Cell  
411 Signaling, 2276), anti- $\alpha$ -syn (C-20) 1:200 (Santa Cruz Biotechnology, sc-7011-R),  
412 anti- $\alpha$ -syn (SYN-1) 1:200 (BD Transduction Laboratories, 610787) and anti- $\alpha$ -  
413 syn(phosphoS129) 1:200 (Abcam, ab59264). For detection, Alexa Fluor-488, -594 or  
414 -647 (Life Technologies) antibodies were used. Image acquisition was performed  
415 using C1 Nikon confocal microscope (60x oil, NA 1.49, 7x zoom-in).

## 416 **Immunofluorescence with labelled $\alpha$ -syn fibrils**

417 Human  $\alpha$ -syn fibrils were fluorescently labelled with Alexa-488 succinimidyl ester  
418 (Thermo Fisher Scientific, A20000) following manufacturer's instructions and the  
419 unbound fluorophore was removed with multiple dialysis steps in sterile PBS. Uptake  
420 experiments were performed following standard IF protocol or following the protocol  
421 described by Karpowicz *et al.* [35]. Briefly, cells seeded on coverslips were incubated  
422 with culture medium containing labelled  $\alpha$ -syn fibrils for 24 h. Prior to standard  
423 immunocytochemistry protocol, fluorescence from non-internalized fibrils was  
424 quenched by incubating with Trypan Blue for 5 minutes. Cells were then fixed in 4%  
425 paraformaldehyde for 20 minutes, washed two times and permeabilized with 0.1%  
426 Triton X-100 in PBS 1X for 4 minutes and incubated with HCS Blue Cell Mask 1:1000  
427 for 30 minutes (Thermo Fisher Scientific). Cells were washed twice in PBS 1X and  
428 once in Milli-Q water and mounted with Vectashield mounting medium (Vector Lab, H-  
429 1000). Images acquisition was performed using C1 Nikon confocal microscope (60x  
430 oil, NA 1.49, 7x zoom-in) as z-stacks of 0.5 µm.

## 431 **Immunohistochemistry**

432 For immunohistochemistry, free-floating slides were rinsed three times in 0.1M  
433 phosphate buffered saline (PBS; pH 7.6), contained 0.1% Triton X-100 between each  
434 incubation period. All sections were quenched with 3% H<sub>2</sub>O<sub>2</sub>/10% for 10 min, followed  
435 by several changes of buffer. As a blocking step, sections were then incubated in 7%  
436 normal goat serum and 0.1% Triton-X 100 for 2 hours at room temperature. This was  
437 followed by incubation in primary antibody diluted in 3% normal goat serum and 0.1%  
438 Triton-X 100 at 4°C for 24 hrs. The antibody used was an anti-TH diluted 1:500 (AB-  
439 152, Millipore). After incubation with the primary antibody, sections were rinsed and  
440 then incubated for 2 hours at room temperature with biotinylated secondary antibodies  
441 (anti-rabbit 1:1000; Thermo Scientific) in the same buffer solution. The reaction was  
442 visualized with avidin-biotin-peroxidase complex (ABC-Elite, Vector Laboratories),  
443 using 3,3-diaminobenzidine as a chromogen. Sections were mounted on super-frost  
444 ultra plus slides (Thermo Scientific), dehydrated in ascending alcohol concentrations,  
445 cleared in xylene and coverslipped in DPX mounting medium.

446 For fluorescent immunohistochemistry, free-floating slides were treated with 0.1 M  
447 glycine for 5 min in PBS 1 × and then with 1% SDS in PBS 1 × for 1 min at RT. Slides  
448 were blocked with 10% NGS, 1% BSA in PBS 1 × for 1 h at RT. The antibodies were  
449 diluted in 1% BSA, 0.3% Triton X-100 in PBS 1 ×. For double immunofluorescence,  
450 incubation with primary antibodies was performed overnight at RT and incubation with  
451 1:500 Alexa fluor-conjugated secondary antibodies (Life Technologie) was performed  
452 for 2 h at RT. Nuclei were labelled with 1 µg/ml DAPI. For triple immunofluorescence,  
453 incubation with primary antibodies was performed overnight at RT, incubation with  
454 1:500 Alexa fluor-conjugated secondary antibodies (Life Technologies) and 1:100  
455 biotin-labelled secondary antibody (Sigma-Aldrich) was performed for 2 h at RT,  
456 followed by 1 h incubation in 1:100 streptavidin, Marina Blue conjugate (Life  
457 Technologies). Slides were mounted with mounting medium for fluorescence  
458 Vectashield (Vector Laboratories). The following primary antibodies were used: anti-  
459 TH 1:1000 (Sigma-Aldrich or Millipore), anti-FLAG 1:100 (Sigma-Aldrich), anti-MYC  
460 1:100 (Cell Signaling) and anti-Hemoglobin 1:1000 (MP Biomedicals). For detection,  
461 Alexa fluor-488 or -594 (Life Technologies) were used. All images were collected using  
462 confocal microscopes (LEICA TCS SP2).

## 463 **Quantification of DA neurons in the SNpc**

464 The number of TH positive cells were determined by counting every fourth 40- $\mu$ m  
465 sections as previously described (28). The delimitation between the ventral tegmental  
466 area and the SN was determined by using the medial terminal nucleus of the  
467 accessory optic tract as a landmark. All counts were performed blind to the  
468 experimental status of the animals through ImageJ software. TH+ cells were counted  
469 using “3D object counter tool”. Each found object has been quantified applying default  
470 settings. The following parameters were modified: Size filter set to 10-20 voxels,  
471 threshold set to: 128. Values were expressed as absolute quantification of unilateral  
472 SNpc TH+ cells.

## 473 **Statistical Analysis**

474 All data were obtained by at least three independent experiments. Data represent the  
475 mean  $\pm$  S.E.M. and each group was compared individually with the reference control  
476 group using GraphPad Prism (v9) software. To compare the means of two samples,  
477 groups were first tested for normality, and then for homogeneity of variance  
478 (homoscedasticity). If the normality assumption was not met, data were analysed by  
479 nonparametric Mann-Whitney test. If the normality assumption was met, but  
480 homogeneity of variance was not, data were analysed by unpaired two-tailed t-test  
481 followed by Welch’s correction. If both assumptions were met, data were analysed by  
482 unpaired two-tailed t-test. To compare more than 2 groups One-Way ANOVA was  
483 used. Regarding statistical analysis of static rods experiments, each group were  
484 analysed by Chi-squared test. Significance to reference samples are shown as \*,  $p \leq$   
485 0.05; \*\*,  $p \leq 0.01$ ; \*\*\*,  $p \leq 0.001$ ; \*\*\*\*,  $p \leq 0.0001$ .

## 486 **RESULTS**

### 487 **Biochemical analysis and structural characterization of $\alpha$ -syn PFFs preparation**

488 Recombinant human  $\alpha$ -syn fibrillation was monitored by thioflavin T (ThT)  
489 fluorescence and preformed fibrils (PFFs) were collected at plateau as long fibrils.  
490 Atomic force microscopy (AFM) was performed as previously reported (29) to confirm  
491 the presence of PFFs (Supplementary Figure 1a and b). Immunoblotting confirmed  
492 the presence of high molecular weight species in  $\alpha$ -syn PFFs preparations by using



493 two epitope-specific antibodies, namely  $\alpha$ -syn C-20 and  $\alpha$ -syn SYN-1. The former is  
494 raised against the  $\alpha$ -syn C-terminal epitope, recognising specifically FL- $\alpha$ -syn; the  
495 latter instead is specific for the  $\alpha$ -syn C-terminal truncated species being  
496 immunoreactive to peptides containing 15 to 123 amino acid (Supplementary Figure  
497 1c).

498 Both Ms and PFFs preparations contains monomeric and dimeric  $\alpha$ -syn. High  
499 molecular weight species are detected in PFFs preparation as a smear.

500 In addition, both preparations present  $\Delta$ C- $\alpha$ -syn species (Supplementary Figure 1d).  
501 Prior to the main experiment, PFFs cellular internalization and the presence of  
502 pSer129 have been verified by immunofluorescence (IF) (Figure 1). Hb and control  
503 (CTRL) cells were supplemented with Alexa-488 labelled PFFs for 24 hours. As  
504 showed in Figure 1a small punctate structures were present inside the cells. PFFs  
505 uptake has been confirmed via a modified IF assay in which cells were incubated with  
506 Trypan blue that is reported to quench green fluorescence and to have affinity for  
507 amyloid fold (30). This assay confirmed the previous experiment (Supplementary  
508 Figure 1e).

509 Intracellular accumulation of  $\alpha$ -syn was confirmed by western blot (Figure 1b) having  
510 both untreated and Ms-treated cells as negative controls. Moreover,  $\alpha$ -syn PFFs  
511 inclusions were positively stained by the antibody recognizing pSer129 (Figure 1c),  
512 resembling one of the most prominent PTMs involved in  $\alpha$ -syn fibrillation (8, 31).

513 Finally, the *in vitro* cytotoxicity of PFFs in both Hb and CTRL cells has been evaluated  
514 using methyl tetrazolium (MTT) assay at different time points. PFFs uptake induce a  
515 significant decrease of viable cells already after 24 hours treatment (Supplementary  
516 Figure 2).

### 517 **Hb triggers the accumulation of a C-terminal truncated form of $\alpha$ -syn *in vitro***

518 To investigate the role of Hb in  $\alpha$ -syn truncation we took advantage of DA iMN9D cell  
519 line stably overexpressing  $\alpha$  and  $\beta$ -chains of Hb (Hb cells) forming the  $\alpha_2\beta_2$  tetramer  
520 (17, 18, 32). We induced the prion-like conformational templating, mimicking the  $\alpha$ -syn  
521 misfolding cyclic amplification, by supplying Hb and CTRL cells with pSer129 PFFs.

522 To characterize  $\alpha$ -syn species in our model, we took advantage of epitope-specific  
523 antibodies for semi-quantitative western blot (WB) by using SYN-1 antibody in

524 comparison with SYN-C-20 (Supplementary Figure 1c).

525 Hb and CTRL cells were treated with PFFs for 24, 48 and 96 hours. Upon its  
526 administration, we analysed  $\alpha$ -syn species at the different time points. Broadly, the  
527 expression of FL- $\alpha$ -syn decreased over time, whereas  $\Delta$ C- $\alpha$ -syn species increased  
528 (Figure 2a and b), similarly to findings reported by Sacino and colleagues in neuronal-  
529 glial cultures and CHO cells (33). Extracellular  $\alpha$ -syn species, instead, were stable  
530 over time (Supplementary Figure 3). Notably,  $\Delta$ C- $\alpha$ -syn was reproducibly more  
531 abundant in Hb than CTRL cells at each time point and the levels of  $\Delta$ C- $\alpha$ -syn  
532 normalized to FL- $\alpha$ -syn ( $\Delta$ C- $\alpha$ -syn/FL- $\alpha$ -syn ratio) were higher in Hb than CTRL cells  
533 with a statistically significant difference at each time point (Figure 1a and c).

534 In the last decade, nHb <sup>$\alpha$ -syn</sup> complexes have been identified in both non-human  
535 primates (NHP) and PD brains (19). Therefore, in order to assess Hb and  $\alpha$ -syn PFFs  
536 interaction, iMN9D cell lysates were incubated with biotinylated PFFs and fibrils were  
537 pulled-down through NeutrAvidin resin. WB revealed that PFFs do not interact with  
538 Hb. Therefore, we concluded that  $\Delta$ C- $\alpha$ -syn accumulation is not mediated by a direct  
539 protein interaction (Figure 2d and e).

#### 540 **Contribution of different proteases on the accumulation of $\alpha$ -syn C-terminal** 541 **truncated species**

542 The presence of  $\Delta$ C- $\alpha$ -syn has been reported in the core of different types of  
543 aggregates in PD and Incidental Lewy Body Disease (34). C-terminal truncation of  $\alpha$ -  
544 syn could be particularly detrimental as the  $\Delta$ C- $\alpha$ -syn self-assembles into fibrils and  
545 increases the aggregation rate in both cultured cells (35, 36) and animal models (37-  
546 39). Both endogenous and pathologic  $\alpha$ -syn undergo proteolytic processing producing  
547 truncations relevant for the disease. To date, the entirety of proteases forming  
548 truncated species found in human diseases have not been identified. However,  
549 proteases particularly prone to partial degradation of  $\alpha$ -syn into  $\Delta$ C- $\alpha$ -syn are already  
550 defined (40, 41) and include calpain I (Capn I), cathepsin D (Ctsd) and caspase 1  
551 (Cas1) (12). Following the evaluation of the mRNA transcripts profile for Hb cells, we  
552 excluded caspase 1 from our study on the basis of its low expression (*data not shown*).  
553 To investigate the role of the Capn I in our *in vitro* model, we analysed the effect its  
554 specific inhibitor Capn inhibitor III (CI-III) on the  $\Delta$ C- $\alpha$ -syn/FL- $\alpha$ -syn ratio.

555 iMN9D Hb cells were treated with vehicle DMSO (-) or CI-III (+) 24 hours prior amyloids  
556 administration. CI-III treatment was monitored at 24 and 48 hours. In both  
557 experimental conditions, treated cells presented increased levels of  $\alpha$ -spectrin, a well-  
558 known Capn I substrate, in response to CI-III treatment (Figure 3e).  $\Delta$ C- $\alpha$ -syn/FL- $\alpha$ -  
559 syn ratio decreased upon 48 hours of Capn I inhibition, proving this proteinase is  
560 involved in  $\alpha$ -syn truncation in our experimental setting (Figure 3a and c).

561 To assess the role of Ctsd, Hb cells were treated with Pepstatin A, an inhibitor of acid  
562 proteases including Ctsd. In our model, 24 and 48 hours of treatment inhibited the  
563 protease activity approximately of 30% and 20%. However, a high mortality rate  
564 prevented an analysis on  $\alpha$ -syn truncation (Supplementary Figure 4).

### 565 **Hb overexpression in SNpc triggers the accumulation of $\Delta$ C- $\alpha$ -syn and loss of** 566 **DA neurons**

567 To study the effect of Hb in  $\alpha$ -syn truncation and in dopamine neurons homeostasis *in*  
568 *vivo*, we injected a mixture of AAV9-2xFLAG- $\alpha$ -globin and AAV9- $\beta$ -globin-MYC  
569 (indicated as AAV9-Hb) or with AAV9-CTRL bilaterally into the SNpc of mouse brain.  
570 We previously injected these AAV9-Hb in mice and we evaluated only the sub-acute  
571 effect of this treatment (17). The aim of this experiment was to monitor the animals for  
572 a longer time (9 months after the injection) for behavioural and biochemical alterations.  
573 Figure 4a shows the experimental protocol. Given the direct implication of Hb in both  
574 modulating  $\alpha$ -syn truncation *in vitro* and impairing cognitive functions *in vivo* via DA  
575 depletion, we characterized the  $\alpha$ -syn species of SNpc lysate of AAV9-CTRL and  
576 AAV9-Hb mice.

577 Mice overexpressing Hb presented an increased  $\Delta$ C- $\alpha$ -syn/FL- $\alpha$ -syn ratio compared  
578 to control group (Figure 4b). These data proved that an aberrant expression of Hb  
579 increased the quantity of C-terminal truncated species, while FL- $\alpha$ -syn was unfazed  
580 as seen *in vitro* models. Importantly, Hb mice showed a decrease of tyrosine  
581 hydroxylase (TH) expression of about 50% (Figure 4c).

582 To understand whether the TH decrease seen in WB was due to a loss of neurons or  
583 to a decrease of TH enzyme expression, we performed immunohistochemistry  
584 analysis for TH in brain slices from AAV9-Hb or AAV9-CTRL mice and quantified A9  
585 cells in in SNpc (Figure 4d). Results showed that Hb overexpression decreased DA

586 neurons in SNpc of about 50% (Figure 4e).

587 **Hb overexpression in SNpc decreases motor performances and trigger**  
588 **cognitive impairments**

589 To determine whether AAV9-Hb induced behavioural alterations, we subjected mice  
590 to a series of behavioural tests during the 9 months after the injection of the virus  
591 (Figure 4a). We did not observe gross behavioural changes or abnormalities during  
592 the assessment, with no difference in locomotor activity between the two groups at all  
593 the time points examined (Figure 5a). Similarly, rotarod test did not show any motor  
594 coordination impairment (Figure 5b). However, by using different assays for more fine  
595 movement evaluation, we could observe a deficit in AAV9-Hb mice. In horizontal bars,  
596 a test that measure the forelimb strength and coordination, AAV9-Hb mice were  
597 performing worse than WT animals starting from 5 months after the injection (Figure  
598 5c). Static rods test was used to evaluate the coordination of the mice to walk on  
599 wooden rods of different diameter. In the wider rods (35, 25, 15 mm) there was not a  
600 general worsening of the performance of AAV9-Hb mice, even if at some points AAV9-  
601 Hb did performe worse (Supplementary Figure 5). In the 10 mm rods, that was the  
602 narrowest one, mice often fall out of the rods both during orientation and transit and  
603 AAV9-Hb mice failed to complete the test in a bigger proportion compared to AAV9-  
604 CTRL, with the 9 months post-injection being the time with the widest difference  
605 (Figure 5c and d). Since PD patients experience several non-motor symptoms such  
606 as cognitive dysfunctions that often precede motor symptoms (42), we then tested  
607 mice in two cognitive tests, the novel object recognition test (NOR) and the Y-maze  
608 for spontaneous alternation, assessing recognition memory and spatial working  
609 memory, respectively. In the NOR, AAV9-Hb mice showed a strong deficit in  
610 recognizing the novel object, as indicating by the discrimination ratio (Figure 5e).  
611 Moreover, in the Y-maze, AAV9-Hb mice displayed less spontaneous alternation  
612 compared to AAV9-CTRL mice with no difference in the total entries in the arms  
613 (Figure 5f). These data demonstrated that Hb expression in SNpc and the subsequent  
614 partial loss of DA neurons induced mild motor impairments and cognitive deficits.

615 **DISCUSSION**

616  $\alpha$ -syn is a neuronal protein that is prone to misfold and polymerize into toxic fibrils.

617 These are the main component of LB, intracellular protein inclusions found in affected  
618 neurons in neurodegenerative diseases.

619 Although the triggering event is still unclear, gathering evidence prove the pivotal role  
620 of a particular PTM truncation of the carboxyl-terminal region of  $\alpha$ -syn ( $\Delta$ C- $\alpha$ -syn).

621  $\Delta$ C- $\alpha$ -syn species are known to increase the pathological aggregation into LB  
622 inclusions both having a robust aggregation propensity itself and accelerating FL- $\alpha$ -  
623 syn aggregation. Indeed, increasing in prion-like seeding has been shown both *in vitro*  
624 and *in vivo* (11, 12, 43, 44). Gene expression profiling identified the transcript of  $\alpha$  and  
625  $\beta$ -chain of Hb in neurons, particularly enriched in A9 DA neurons (16, 45, 46). Several  
626 evidence correlate Hb in neurodegenerative diseases (47). An increased levels of Hb  
627 has been found in aging brain of rodents and humans as well as in neurons and glia  
628 of AD patients and in neurons of AD mouse models (45). In post-mortem brain from  
629 PD patients,  $\alpha$ - and  $\beta$ -chains mRNAs levels were increased (48). Moreover, recent  
630 studies demonstrate that nHb may form complexes with  $\alpha$ -syn in brain tissues of  
631 cynomolgus monkeys (19, 20). We previously demonstrated the association between  
632 Hb overexpression and the susceptibility to cell death of DA cell *in vitro* and that Hb  
633 overexpression caused nucleolar stress and autophagy inhibition (17). In this context,  
634 we focused on elucidating the potential interplay between Hb and  $\alpha$ -syn.

635 To this purpose, we took advantage of iMN9D cells overexpressing  $\alpha$  and  $\beta$  chains of  
636 Hb supplemented with PFFs known to recruit FL- $\alpha$ -syn to the core of the pathological  
637 inclusions and resemble LB features found in PD brains (49, 50).  $\alpha$ -syn PFFs with  
638 pSer129 PTM were internalized by both Hb and CTRL cells. We demonstrated that  
639 FL- $\alpha$ -syn levels decreased over time and in treated Hb cells  $\Delta$ C- $\alpha$ -syn was enriched  
640 by 3-fold as compared to control. The Hb-dependent  $\Delta$ C- $\alpha$ -syn/FL- $\alpha$ -syn increased  
641 ratio suggests an Hb involvement in the  $\alpha$ -syn C-terminal truncation mechanism.

642 Physiologic and pathologic production of C-terminal truncated species is mediated by  
643 different proteases, many of them directly correlating to the disease, as have been  
644 found co-localizing with  $\Delta$ C- $\alpha$ -syn in LB inclusions (51). This is particularly the case  
645 for Capn I whose activity is found increased in the SNpc of PD patients (52).  
646 Interestingly, Capn I inhibitors ease pathologic features in mouse models of  
647 synucleinopathy (53). However, lysosomal cathepsins are known to be strongly  
648 involved in the normal breakdown of both monomeric and fibrillary  $\alpha$ -syn (54). In this

649 framework, we investigated the role of Hb in the  $\alpha$ -syn clearance and truncation by  
650 evaluating the  $\Delta$ C- $\alpha$ -syn accumulation upon protease-specific inhibitors in Hb and  
651 CTRL cells. We identified Capn I as involved in C-terminal  $\alpha$ -syn truncation since its  
652 selective inhibition reduced the  $\Delta$ C- $\alpha$ -syn/FL- $\alpha$ -syn ratio. Conversely, insights on the  
653 role of CstD cannot be provided from this study since the inhibition of this protease  
654 was limited and caused massive cell death.

655 To characterize the involvement of Hb in  $\alpha$ -syn C-terminal truncation, we induced Hb  
656 overexpression via bilateral AAV9-Hb injection in SNpc of mouse brain. Interestingly,  
657  $\Delta$ C- $\alpha$ -syn content in SNpc showed an increase of about 80% compared to AAV9-  
658 CTRL mice, recapitulating the effect obtained in the *in vitro* experiments. Although the  
659 increase is minor compared to the one observed *in vitro*, it is of note that we observed  
660 this enhancement on the endogenous  $\alpha$ -syn levels, while *in vitro* cells were treated  
661 with PFFs. It would be interesting to study the role of Hb in animal models of  
662 synucleinopathies or in PD mouse models where  $\alpha$ -syn is over-expressed (44). In the  
663 WB analysis we also noted a clear effect on TH levels in SNpc lysates indicating a  
664 potential loss of DA neurons. By counting DA cells in the SNpc we confirmed the partial  
665 loss (50%) of DA neurons in this area. Whether this loss is due solely to Hb over-  
666 expression or to the accumulation of the  $\Delta$ C- $\alpha$ -syn species or to both of these  
667 phenomena has yet to be established. These data are consistent with the reduction of  
668 DA levels shown in animal models overexpressing  $\Delta$ C- $\alpha$ -syn (55, 56). Along with  
669 neurodegeneration, such mice present deficits in locomotion and in cortical-  
670 hippocampal memory test (37). Moreover, passive immunization against  $\Delta$ C- $\alpha$ -syn  
671 ameliorated neurodegeneration and neuroinflammation, reducing the accumulation of  
672  $\Delta$ C- $\alpha$ -syn and improved motor and memory deficits in a mouse model of PD (57). Yet,  
673 since the role of Hb in the degeneration of DA neurons is much less known, more  
674 studies are needed to unveil the precise role and the interplay between Hb and  $\alpha$ -syn  
675 truncation *in vivo*.

676 As for several non-neurotoxin-based PD mouse model, the putative toxic effect on DA  
677 neurons of Hb over-expression was expected to be slow. Therefore, we monitored  
678 animals' behavior for 9 months after the virus injection. Consistent with the partial loss  
679 of DA neurons, we did not see overt motor impairments as indicated by locomotor  
680 activity and rotarod test. However, two tests that evaluate different motor skills showed

681 that AAV9-Hb mice displayed mild motor deficits. These results are in agreement with  
682 what observed in PD patients and animal models, where motor symptoms appear  
683 when most of the dopaminergic fibers are already lost (42). Before the onset of motor  
684 symptoms, PD patients often experience several non-motor deficits, such as cognitive  
685 impairments (42). Accordingly, a PD mouse model with bilateral partial 6-  
686 hydroxydopamine lesion showed a loss of about 60% of SNpc DA neurons, a mild  
687 motor phenotype (e.g. no locomotor activity alteration) and substantial cognitive  
688 deficits, as evidenced in NOR test and in other behavioural assays not related to motor  
689 functions (58). In this work, Hb mice have showed a similar loss of DA neurons, mild  
690 motor impairments and considerable cognitive deficits involving recognition and  
691 spatial working memory phenocopying features of the PD mouse model.

## 692 **CONCLUSION**

693 Our study indicates Hb a potential previously unrecognized modifier of PD that  
694 warrants further investigation. Several evidence demonstrates an increase of Hb  
695 expression in post-mortem brains of several neurodegenerative diseases including  
696 AD, PD and MSA. Given the effects of Hb overexpression in SNpc, an analysis of the  
697 correlation between genetic variation of Hb genes and nHb levels in the brain is  
698 needed to potentially associate nHb expression to the onset of neurodegenerative  
699 diseases, including PD.

## 700 **ABBREVIATIONS**

701  $\alpha$ -syn, alpha-synuclein;  
702 Ms, monomers;  
703 PTMs, post-translational modifications;  
704 pSer-129, phosphorylated serine 129;  
705  $\Delta$ C-  $\alpha$ -syn, C-terminal truncated  $\alpha$ -syn;  
706 FL-  $\alpha$ -syn, full-length  $\alpha$ -syn;  
707 PD, Parkinson's disease;  
708 LBD, Lewy Body Dementia;  
709 MSA, Multiple System Atrophy;  
710 SNpc, *Substantia nigra pars compacta*;  
711 GCIs, Glial cytoplasmic inclusions;

712 DA, dopaminergic;  
713 Hb, hemoglobin;  
714 nHb, neuronal Hb;  
715 MPP<sup>+</sup>, 1-methyl-4-phenylpyridinium;  
716 PFFs, pre-formed fibrils;  
717 AFM, Atomic force microscopy;  
718 NHP, non-human primates;  
719 Capn I, Calpain I;  
720 Ctsd, cathepsin D;  
721 Cas1, caspase 1;  
722 TH, tyrosine hydroxylase;  
723 NOR, novel object recognition;

#### 724 **ACKNOWLEDGEMENTS**

725 We are indebted to all the members of the SG laboratory for thought-provoking  
726 discussions. We are grateful to SISSA, IIT technical and administrative staff, especially  
727 to Micaela Grandolfo, Omar Peruzzo and Eva Ferri, and Università del Piemonte  
728 Orientale (UPO).

#### 729 **FUNDING**

730 This work has been funded by intramural IIT support to SG and supported by the  
731 Ministero dell'Università e della Ricerca (MIUR), Bando PRIN 2017-Prot.  
732 2017SNRXH3 to FP.

#### 733 **AVAILABILITY OF DATA AND MATERIALS**

734 The manuscript has data included as electronic Additional information.

#### 735 **ETHICS APPROVAL**

736 All animal experiments were performed in accordance with European guidelines for  
737 animal care and following Italian Board Health permissions (D.Lgs. 26/2014, 4 March  
738 2014).

#### 739 **COMPETING INTERESTS**

740 The authors declare no conflict of interest.



741 **AUTHORS' CONTRIBUTIONS**

742 CS designed, carried and analysed the *in vitro* experiments, wrote the manuscript; CB  
743 performed and analysed the *ex vivo* experiments, wrote the manuscript; ED carried  
744 out and analysed  $\alpha$ -syn recombinant production and fibrillation; MC, CIS and FP  
745 analysed the data and discussed experimental results;

746 NJ, PP and PF discussed experimental results; PP performed and PF supervised AFM  
747 experiments; GL provide the fibrils, analysed the data and discussed experimental  
748 results; S.E. conceived the project and carried out the *in vivo* experiments, analysed  
749 the data and composed the manuscript; SG conceived the project, designed the  
750 experiments, supervised the study, and wrote the manuscript.

751 All authors contributed to this work, read the manuscript and agreed to its contents.

752 **AUTHOR DETAILS**

753 **Affiliations:**

754 <sup>1</sup>Area of Neuroscience, Scuola Internazionale Superiore di Studi Avanzati (SISSA),  
755 Trieste, Italy.

756 <sup>2</sup>Central RNA Laboratory, Istituto Italiano di Tecnologia (IIT), Genova, Italy.

757 <sup>3</sup>ELETTRA Synchrotron Light Source, Trieste, Italy.

758 <sup>4</sup>Department of Health Sciences and Research Center on Autoimmune and Allergic

759 <sup>5</sup>Diseases (CAAD), University of Piemonte Orientale (UPO), Novara, Italy.

760 **Corresponding authors:**

761 Correspondence to Stefano Gustincich or Stefano Espinoza.

762

## 763 REFERENCES

- 764 1. Bendor JT, Logan TP, Edwards RH. The function of alpha-synuclein. *Neuron*.  
765 2013;79(6):1044-66.
- 766 2. Fusco G, De Simone A, Gopinath T, Vostrikov V, Vendruscolo M, Dobson CM,  
767 et al. Direct observation of the three regions in alpha-synuclein that determine its  
768 membrane-bound behaviour. *Nat Commun*. 2014;5:3827.
- 769 3. Fusco G, Pape T, Stephens AD, Mahou P, Costa AR, Kaminski CF, et al.  
770 Structural basis of synaptic vesicle assembly promoted by alpha-synuclein. *Nat*  
771 *Commun*. 2016;7:12563.
- 772 4. Serpell LC, Berriman J, Jakes R, Goedert M, Crowther RA. Fiber diffraction of  
773 synthetic alpha-synuclein filaments shows amyloid-like cross-beta conformation.  
774 *Proceedings of the National Academy of Sciences of the United States of America*.  
775 2000;97(9):4897-902.
- 776 5. Aulić S, Le TTN, Moda F, Abounit S, Corvaglia S, Casalis L, et al. Defined  $\alpha$ -  
777 synuclein prion-like molecular assemblies spreading in cell culture. *BMC*  
778 *Neuroscience*. 2014;15(1):69-.
- 779 6. Crowther RA, Jakes R, Spillantini MG, Goedert M. Synthetic filaments  
780 assembled from C-terminally truncated alpha-synuclein. *FEBS Lett*. 1998;436(3):309-  
781 12.
- 782 7. Iljina M, Garcia GA, Horrocks MH, Tosatto L, Choi ML, Ganzinger KA, et al.  
783 Kinetic model of the aggregation of alpha-synuclein provides insights into prion-like  
784 spreading. *Proc Natl Acad Sci U S A*. 2016;113(9):E1206-15.
- 785 8. Anderson JP, Walker DE, Goldstein JM, de Laat R, Banducci K, Caccavello RJ,  
786 et al. Phosphorylation of Ser-129 is the dominant pathological modification of alpha-  
787 synuclein in familial and sporadic Lewy body disease. *J Biol Chem*.  
788 2006;281(40):29739-52.
- 789 9. Murray IVJ, Giasson BI, Quinn SM, Koppaka V, Axelsen PH, Ischiropoulos H,  
790 et al. Role of alpha-synuclein carboxy-terminus on fibril formation in vitro.  
791 *Biochemistry*. 2003;42(28):8530-40.
- 792 10. Hoyer W, Cherny D, Subramaniam V, Jovin TM. Impact of the acidic C-terminal  
793 region comprising amino acids 109-140 on alpha-synuclein aggregation in vitro.  
794 *Biochemistry*. 2004;43(51):16233-42.

- 795 11. Murray IV, Giasson BI, Quinn SM, Koppaka V, Axelsen PH, Ischiropoulos H, et  
796 al. Role of alpha-synuclein carboxy-terminus on fibril formation in vitro. *Biochemistry*.  
797 2003;42(28):8530-40.
- 798 12. Sorrentino ZA, Giasson BI. The emerging role of alpha-synuclein truncation in  
799 aggregation and disease. *J Biol Chem*. 2020;295(30):10224-44.
- 800 13. Goedert M, Jakes R, Spillantini MG. The Synucleinopathies: Twenty Years On.  
801 *Journal of Parkinson's disease*. 2017;7(s1):S51-S69.
- 802 14. Liu CW, Giasson BI, Lewis KA, Lee VM, Demartino GN, Thomas PJ. A  
803 precipitating role for truncated alpha-synuclein and the proteasome in alpha-synuclein  
804 aggregation: implications for pathogenesis of Parkinson disease. *J Biol Chem*.  
805 2005;280(24):22670-8.
- 806 15. Tu PH, Galvin JE, Baba M, Giasson B, Tomita T, Leight S, et al. Glial  
807 cytoplasmic inclusions in white matter oligodendrocytes of multiple system atrophy  
808 brains contain insoluble alpha-synuclein. *Ann Neurol*. 1998;44(3):415-22.
- 809 16. Biagioli M, Pinto M, Cesselli D, Zaninello M, Lazarevic D, Roncaglia P, et al.  
810 Unexpected expression of alpha- and beta-globin in mesencephalic dopaminergic  
811 neurons and glial cells. *Proc Natl Acad Sci U S A*. 2009;106(36):15454-9.
- 812 17. Codrich M, Bertuzzi M, Russo R, Francescato M, Espinoza S, Zentilin L, et al.  
813 Neuronal hemoglobin affects dopaminergic cells' response to stress. *Cell Death Dis*.  
814 2017;8(1):e2538.
- 815 18. Russo R, Zucchelli S, Codrich M, Marcuzzi F, Verde C, Gustincich S.  
816 Hemoglobin is present as a canonical alpha2beta2 tetramer in dopaminergic neurons.  
817 *Biochim Biophys Acta*. 2013;1834(9):1939-43.
- 818 19. Yang W, Li X, Li X, Li X, Yu S. Neuronal hemoglobin in mitochondria is reduced  
819 by forming a complex with alpha-synuclein in aging monkey brains. *Oncotarget*.  
820 2016;7(7):7441-54.
- 821 20. Yang W, Li X, Li X, Yu S. Hemoglobin-alpha-synuclein complex exhibited age-  
822 dependent alterations in the human striatum and peripheral RBCs. *Neurosci Lett*.  
823 2020;736:135274.
- 824 21. Zucca FA, Segura-Aguilar J, Ferrari E, Munoz P, Paris I, Sulzer D, et al.  
825 Interactions of iron, dopamine and neuromelanin pathways in brain aging and  
826 Parkinson's disease. *Prog Neurobiol*. 2017;155:96-119.

- 827 22. Ward PA, Till GO, Gannon DE, Varani JA, Johnson KJ. The role of iron in injury  
828 of endothelial cells in vitro and in vivo. *Basic Life Sci.* 1988;49:969-74.
- 829 23. Rouault TA. Iron metabolism in the CNS: implications for neurodegenerative  
830 diseases. *Nat Rev Neurosci.* 2013;14(8):551-64.
- 831 24. Biedler JL, Helson L, Spengler BA. Morphology and growth, tumorigenicity, and  
832 cytogenetics of human neuroblastoma cells in continuous culture. *Cancer research.*  
833 1973;33(11):2643-52.
- 834 25. Huang C, Ren G, Zhou H, Wang C-c. A new method for purification of  
835 recombinant human alpha-synuclein in *Escherichia coli*. *Protein expression and*  
836 *purification.* 2005;42(1):173-7.
- 837 26. Bousset L, Brundin P, Bockmann A, Meier B, Melki R. An Efficient Procedure  
838 for Removal and Inactivation of Alpha-Synuclein Assemblies from Laboratory  
839 Materials. *Journal of Parkinson's disease.* 2016;6(1):143-51.
- 840 27. Latawiec D, Herrera F, Bek A, Losasso V, Candotti M, Benetti F, et al.  
841 Modulation of alpha-synuclein aggregation by dopamine analogs. *PloS one.*  
842 2010;5(2):e9234-e.
- 843 28. Bensadoun JC, Deglon N, Tseng JL, Ridet JL, Zurn AD, Aebischer P. Lentiviral  
844 vectors as a gene delivery system in the mouse midbrain: cellular and behavioral  
845 improvements in a 6-OHDA model of Parkinson's disease using GDNF. *Exp Neurol.*  
846 2000;164(1):15-24.
- 847 29. Aulić S, Masperone L, Narkiewicz J, Isopi E, Bistaffa E, Ambrosetti E, et al.  $\alpha$ -  
848 Synuclein Amyloids Hijack Prion Protein to Gain Cell Entry, Facilitate Cell-to-Cell  
849 Spreading and Block Prion Replication. *Scientific Reports.* 2017;7(1):10050-.
- 850 30. Karpowicz RJ, Jr., Haney CM, Mihaila TS, Sandler RM, Petersson EJ, Lee  
851 VMY. Selective imaging of internalized proteopathic alpha-synuclein seeds in primary  
852 neurons reveals mechanistic insight into transmission of synucleinopathies. *The*  
853 *Journal of biological chemistry.* 2017;292(32):13482-97.
- 854 31. Fujiwara H, Hasegawa M, Dohmae N, Kawashima A, Masliah E, Goldberg MS,  
855 et al. alpha-Synuclein is phosphorylated in synucleinopathy lesions. *Nature cell*  
856 *biology.* 2002;4(2):160-4.
- 857 32. Biagioli M, Pinto M, Cesselli D, Zaninello M, Lazarevic D, Roncaglia P, et al.  
858 Unexpected expression of  $\alpha$ - and  $\beta$ -globin in mesencephalic dopaminergic neurons

- 859 and glial cells. *Proceedings of the National Academy of Sciences*. 2009;106(36):15454  
860 LP-9.
- 861 33. Sacino AN, Brooks MM, Chakrabarty P, Saha K, Khoshbouei H, Golde TE, et  
862 al. Proteolysis of alpha-synuclein fibrils in the lysosomal pathway limits induction of  
863 inclusion pathology. *Journal of neurochemistry*. 2017;140(4):662-78.
- 864 34. Prasad K, Beach TG, Hedreen J, Richfield EK. Critical role of truncated alpha-  
865 synuclein and aggregates in Parkinson's disease and incidental Lewy body disease.  
866 *Brain pathology (Zurich, Switzerland)*. 2012;22(6):811-25.
- 867 35. Stefanova N, Klimaschewski L, Poewe W, Wenning GK, Reindl M. Glial cell  
868 death induced by overexpression of alpha-synuclein. *J Neurosci Res*. 2001;65(5):432-  
869 8.
- 870 36. Stefanova N, Seppi K, Scherfler C, Puschban Z, Wenning GK. Depression in  
871 alpha-synucleinopathies: prevalence, pathophysiology and treatment. *J Neural*  
872 *Transm Suppl*. 2000(60):335-43.
- 873 37. Hall K, Yang S, Sauchanka O, Spillantini MG, Anichtchik O. Behavioural deficits  
874 in transgenic mice expressing human truncated (1-120 amino acid) alpha-synuclein.  
875 *Experimental neurology*. 2015;264:8-13.
- 876 38. Tofaris GK, Goedert M, Spillantini MG. The Transcellular Propagation and  
877 Intracellular Trafficking of alpha-Synuclein. *Cold Spring Harbor perspectives in*  
878 *medicine*. 2017;7(9).
- 879 39. Periquet M, Fulga T, Myllykangas L, Schlossmacher MG, Feany MB.  
880 Aggregated alpha-synuclein mediates dopaminergic neurotoxicity in vivo. *J Neurosci*.  
881 2007;27(12):3338-46.
- 882 40. Bassil F, Fernagut P-O, Bezard E, Pruvost A, Leste-Lasserre T, Hoang QQ, et  
883 al. Reducing C-terminal truncation mitigates synucleinopathy and neurodegeneration  
884 in a transgenic model of multiple system atrophy. *Proceedings of the National*  
885 *Academy of Sciences of the United States of America*. 2016;113(34):9593-8.
- 886 41. Wang W, Nguyen LTT, Burlak C, Chegini F, Guo F, Chataway T, et al. Caspase-  
887 1 causes truncation and aggregation of the Parkinson's disease-associated protein  
888 alpha-synuclein. *Proceedings of the National Academy of Sciences of the United*  
889 *States of America*. 2016;113(34):9587-92.
- 890 42. Kalia LV, Lang AE. Parkinson's disease. *Lancet*. 2015;386(9996):896-912.

- 891 43. Liu C-W, Giasson BI, Lewis KA, Lee VM, Demartino GN, Thomas PJ. A  
892 precipitating role for truncated alpha-synuclein and the proteasome in alpha-synuclein  
893 aggregation: implications for pathogenesis of Parkinson disease. *The Journal of*  
894 *biological chemistry*. 2005;280(24):22670-8.
- 895 44. Ulusoy A, Febbraro F, Jensen PH, Kirik D, Romero-Ramos M. Co-expression  
896 of C-terminal truncated alpha-synuclein enhances full-length alpha-synuclein-induced  
897 pathology. *The European journal of neuroscience*. 2010;32(3):409-22.
- 898 45. Richter F, Meurers BH, Zhu C, Medvedeva VP, Chesselet M-F. Neurons  
899 Express Hemoglobin  $\alpha$ - and  $\beta$ -Chains in Rat and Human Brains. *The Journal of*  
900 *comparative neurology*. 2009;515(5):538-47.
- 901 46. Schelshorn DW, Schneider A, Kuschinsky W, Weber D, Krüger C, Dittgen T, et  
902 al. Expression of Hemoglobin in Rodent Neurons. *Journal of Cerebral Blood Flow &*  
903 *Metabolism*. 2008;29(3):585-95.
- 904 47. Freed J, Chakrabarti L. Defining a role for hemoglobin in Parkinson's disease.  
905 *NPJ Parkinsons Dis*. 2016;2:16021.
- 906 48. Ferrer I, Gomez A, Carmona M, Huesa G, Porta S, Riera-Codina M, et al.  
907 Neuronal hemoglobin is reduced in Alzheimer's disease, argyrophilic grain disease,  
908 Parkinson's disease, and dementia with Lewy bodies. *J Alzheimers Dis*.  
909 2011;23(3):537-50.
- 910 49. Luk KC, Kehm V, Carroll J, Zhang B, O'Brien P, Trojanowski JQ, et al.  
911 Pathological alpha-synuclein transmission initiates Parkinson-like neurodegeneration  
912 in nontransgenic mice. *Science (New York, NY)*. 2012;338(6109):949-53.
- 913 50. Luk KC, Kehm VM, Zhang B, O'Brien P, Trojanowski JQ, Lee VMY.  
914 Intracerebral inoculation of pathological alpha-synuclein initiates a rapidly progressive  
915 neurodegenerative alpha-synucleinopathy in mice. *The Journal of experimental*  
916 *medicine*. 2012;209(5):975-86.
- 917 51. Mishizen-Eberz AJ, Norris EH, Giasson BI, Hodara R, Ischiropoulos H, Lee  
918 VMY, et al. Cleavage of alpha-synuclein by calpain: potential role in degradation of  
919 fibrillized and nitrated species of alpha-synuclein. *Biochemistry*. 2005;44(21):7818-29.
- 920 52. Crocker SJ, Smith PD, Jackson-Lewis V, Lamba WR, Hayley SP, Grimm E, et  
921 al. Inhibition of calpains prevents neuronal and behavioral deficits in an MPTP mouse  
922 model of Parkinson's disease. *J Neurosci*. 2003;23(10):4081-91.

- 923 53. Diepenbroek M, Casadei N, Esmer H, Saido TC, Takano J, Kahle PJ, et al.  
924 Overexpression of the calpain-specific inhibitor calpastatin reduces human alpha-  
925 Synuclein processing, aggregation and synaptic impairment in [A30P]alphaSyn  
926 transgenic mice. *Hum Mol Genet.* 2014;23(15):3975-89.
- 927 54. Sevlever D, Jiang P, Yen S-HC. Cathepsin D is the main lysosomal enzyme  
928 involved in the degradation of alpha-synuclein and generation of its carboxy-terminally  
929 truncated species. *Biochemistry.* 2008;47(36):9678-87.
- 930 55. Daher JPL, Ying M, Banerjee R, McDonald RS, Hahn MD, Yang L, et al.  
931 Conditional transgenic mice expressing C-terminally truncated human alpha-synuclein  
932 (alphaSyn119) exhibit reduced striatal dopamine without loss of nigrostriatal pathway  
933 dopaminergic neurons. *Molecular neurodegeneration.* 2009;4:34-.
- 934 56. Wakamatsu M, Ishii A, Iwata S, Sakagami J, Ukai Y, Ono M, et al. Selective  
935 loss of nigral dopamine neurons induced by overexpression of truncated human alpha-  
936 synuclein in mice. *Neurobiology of aging.* 2008;29(4):574-85.
- 937 57. Games D, Valera E, Spencer B, Rockenstein E, Mante M, Adame A, et al.  
938 Reducing C-terminal-truncated alpha-synuclein by immunotherapy attenuates  
939 neurodegeneration and propagation in Parkinson's disease-like models. *The Journal*  
940 *of neuroscience : the official journal of the Society for Neuroscience.*  
941 2014;34(28):9441-54.
- 942 58. Bonito-Oliva A, Pignatelli M, Spigolon G, Yoshitake T, Seiler S, Longo F, et al.  
943 Cognitive impairment and dentate gyrus synaptic dysfunction in experimental  
944 parkinsonism. *Biol Psychiatry.* 2014;75(9):701-10.
- 945

946 **FIGURES:**

**Figure 1**

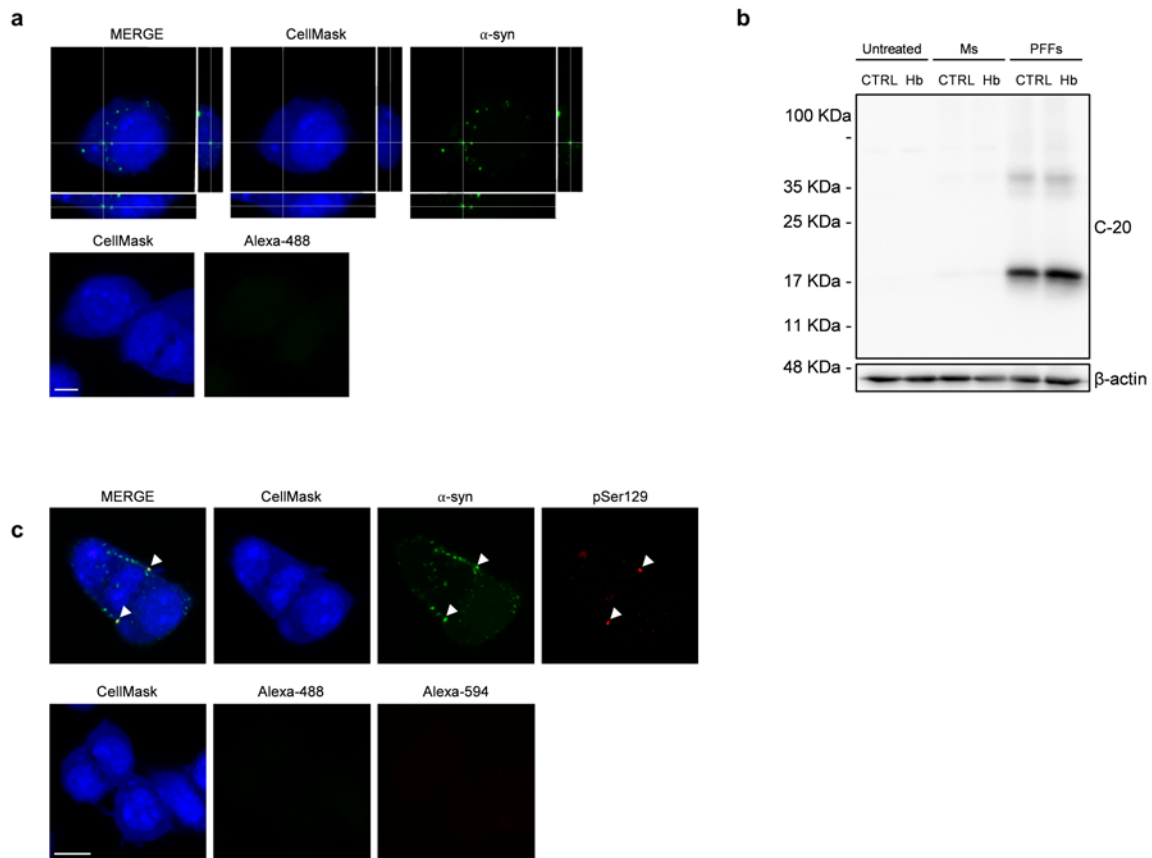

947

948 **Sonicated  $\alpha$ -syn fibrils are internalized by iMN9D cells and are positively stained by pSer129**

949 **antibody.** Representative confocal microscopy images of Hb cells treated with Alexa-488 labelled PFFs

950 for 24 h. Cells not incubated with labelled PFFs were used to establish autofluorescence levels. Entire

951 cells were labelled by CellMask (**a**). Immunoblot of lysates from untreated cells and cells treated with

952 Ms and PFFs for 24 h (**b**). Representative confocal microscopy images of CTRL and Hb cells

953 immunostained for  $\alpha$ -syn phosphorylated at Ser129 (pSer129, Alexa 594, red). Arrows indicate

954 intracellular inclusions positive to pSer129 antibody. Cells incubated only with secondary antibody were

955 used to establish autofluorescence levels. Nuclei were stained with DAPI. Scale bar 10  $\mu$ m (**b**).

956



**Figure 2**

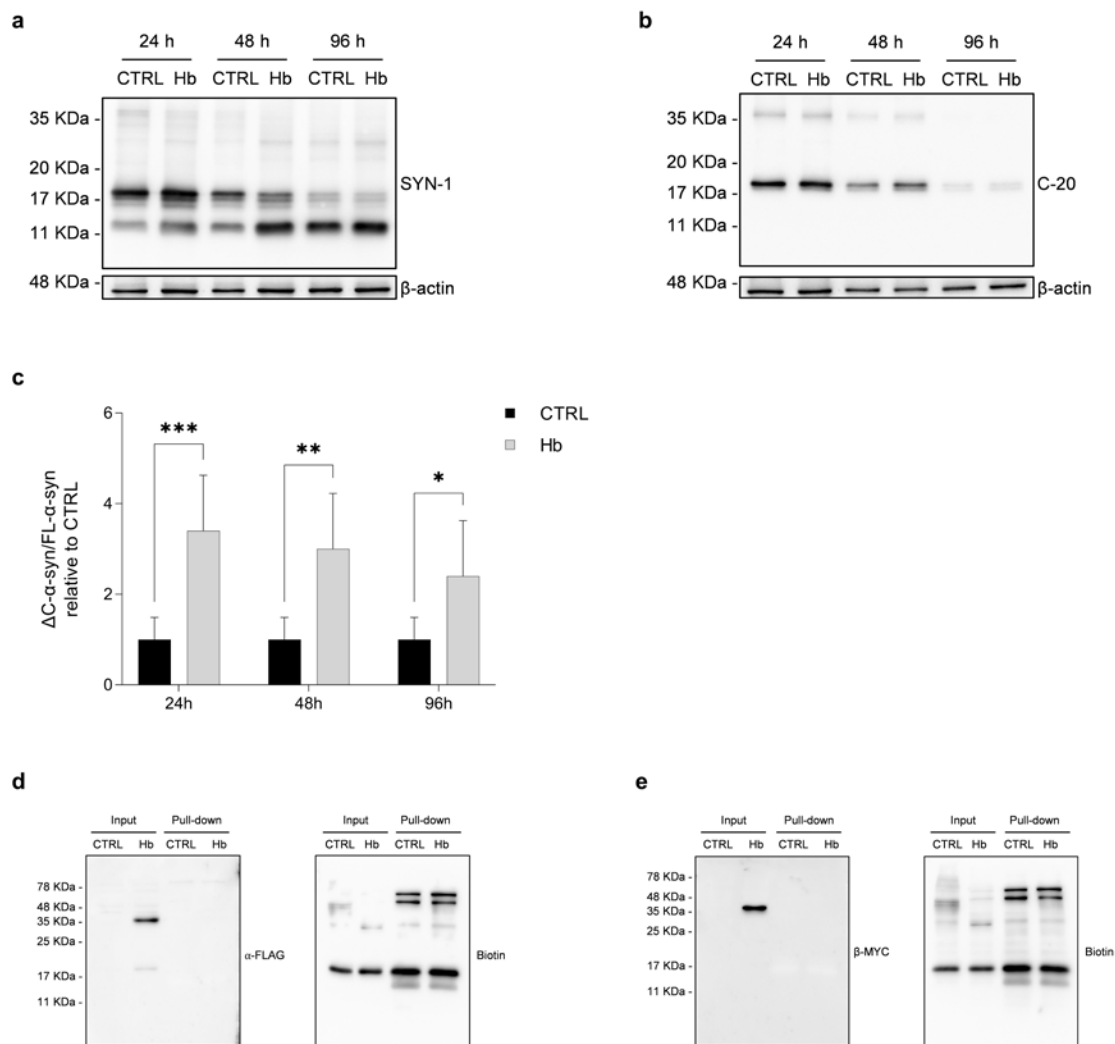

957

958

959

960

961

962

963

964

965

966

967

**C-terminal truncated  $\alpha$ -syn accumulation in the presence of Hb in cell lysates.** CTRL and Hb cells were treated with  $\alpha$ -syn amyloids. Cell lysates were collected at the indicated time points. Cell lysates were analysed by immunoblotting with SYN-1 (**a**) and C-20 antibodies (**b**). Band intensity corresponding to  $\Delta$ C- $\alpha$ -syn and FL- $\alpha$ -syn was quantified and the ratio was calculated. Data represent means  $\pm$  SEM and are representative of six independent experiments. Statistical analysis was performed with one-way Anova. \*,  $p \leq 0.05$ ; \*\*,  $p \leq 0.01$ ; \*\*\*,  $p \leq 0.001$ ; \*\*\*\*,  $p \leq 0.0001$ ; ns, not significant (**c**). Pull down of biotinylated PFFs in iMN9D cell lysates from both CTRL and Hb cells were revealed by immunoblot with anti-FLAG (**d**) and anti MYC (**e**) antibodies. Samples were also revealed with anti-biotin antibody as control of the experiment.

**Figure 3**

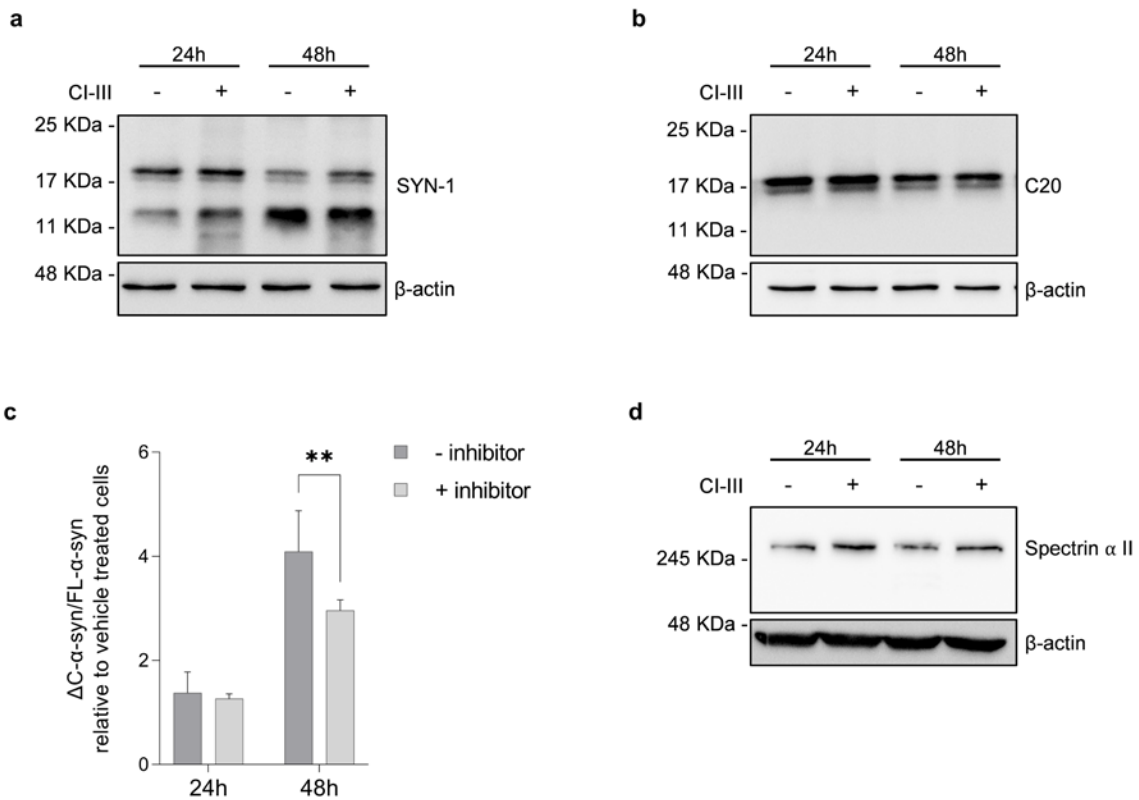

968

969 **Effect of Calpains inhibition on  $\alpha$ -syn C-terminal truncated species accumulation in Hb cells.**

970 Cell lysates of Hb cells treated with DMSO (-) and Calpain inhibitor III (+) were analysed by

971 immunoblotting with SYN-1 (a) and C-20 (b) antibodies. Band intensity corresponding to  $\Delta$ C- $\alpha$ -syn and

972 FL- $\alpha$ -syn was quantified and the ratio was calculated. Data represent means  $\pm$  SEM and are

973 representative of six independent experiments. Statistical analysis was performed with one-way Anova.

974 \*,  $p \leq 0.05$ ; \*\*,  $p \leq 0.01$ ; \*\*\*,  $p \leq 0.001$ ; \*\*\*\*,  $p \leq 0.0001$ ; ns, not significant (c). Cell lysates of Hb cells

975 treated with DMSO (-) and CI-III (+) were analysed by immunoblotting with anti-Spectrin  $\alpha$  II antibody

976 (d).

977

**Figure 4**

**a**

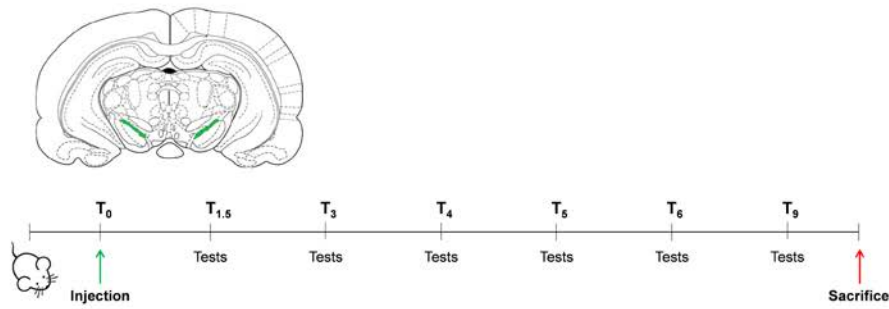

**b**

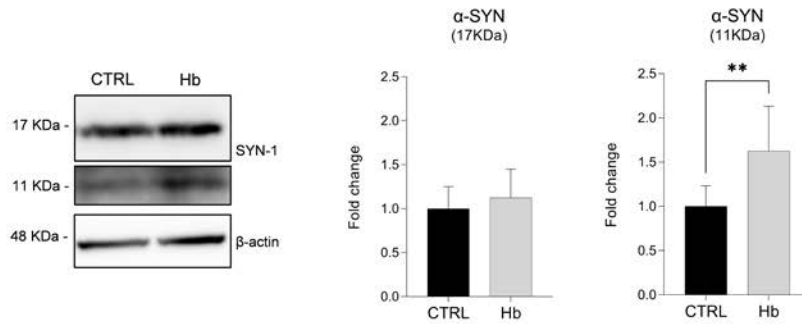

**c**

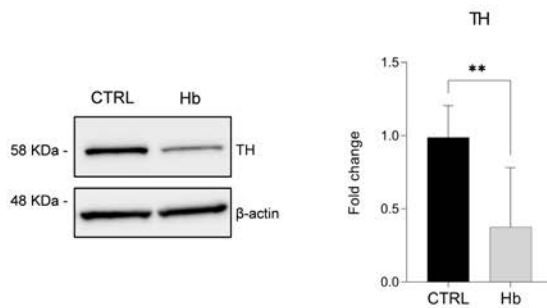

**d**

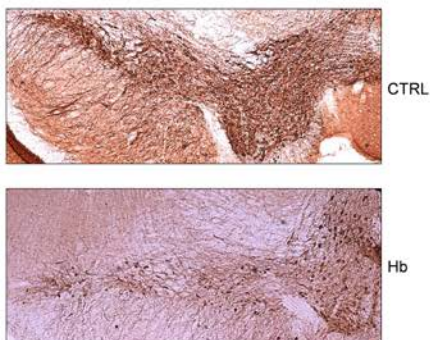

**e**

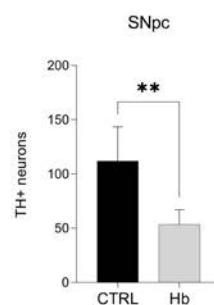

978

979 **Hb overexpression in SNpc triggers the accumulation of ΔC-α-syn and loss of DA neurons.**

980 Scheme representing the experimental protocol used for the assessment Hb overexpression. AAV9

981 expressing Hb (AAV9-Hb) and AAV9-CTRL were bilaterally injected in the brain of 3-months old mice.

982 Brain diagram indicating SNpc (green) as the region of the injection (*upper panel*). Behavioral tests  
983 were performed to verify the locomotor performance of mice 1.5, 3, 4, 5, 6 and 9 months post-injection  
984 (*lower panel*) (**a**). Level of expression in SNpc of Hb and CTRL mice (n=4) at 10 months post-injection  
985 of FL- $\alpha$ -syn (17 KDa),  $\Delta$ C- $\alpha$ -syn (11 KDa) (**b**, *left panel*) and tyrosine hydroxylase (TH, 58 KDa) (**c**, *left*  
986 *panel*) was assessed by western blot. Band intensity was quantified (**b** and **c**, *right panel*). TH-positive  
987 neurons of the SNpc were evaluated by immunohistochemistry (**d**, *left panel*) and quantified (**d**, *right*  
988 *panel*) for Hb and CTRL mice (n=4; 3 slices each). Data represent means  $\pm$  SEM. Statistical analysis  
989 was performed with unpaired t test with Welch's correction. \*,  $p \leq 0.05$ ; \*\*,  $p \leq 0.01$ ; \*\*\*,  $p \leq 0.001$ ; \*\*\*\*,  $p$   
990  $\leq 0.0001$ ; ns, not significant.  
991

**Figure 5**

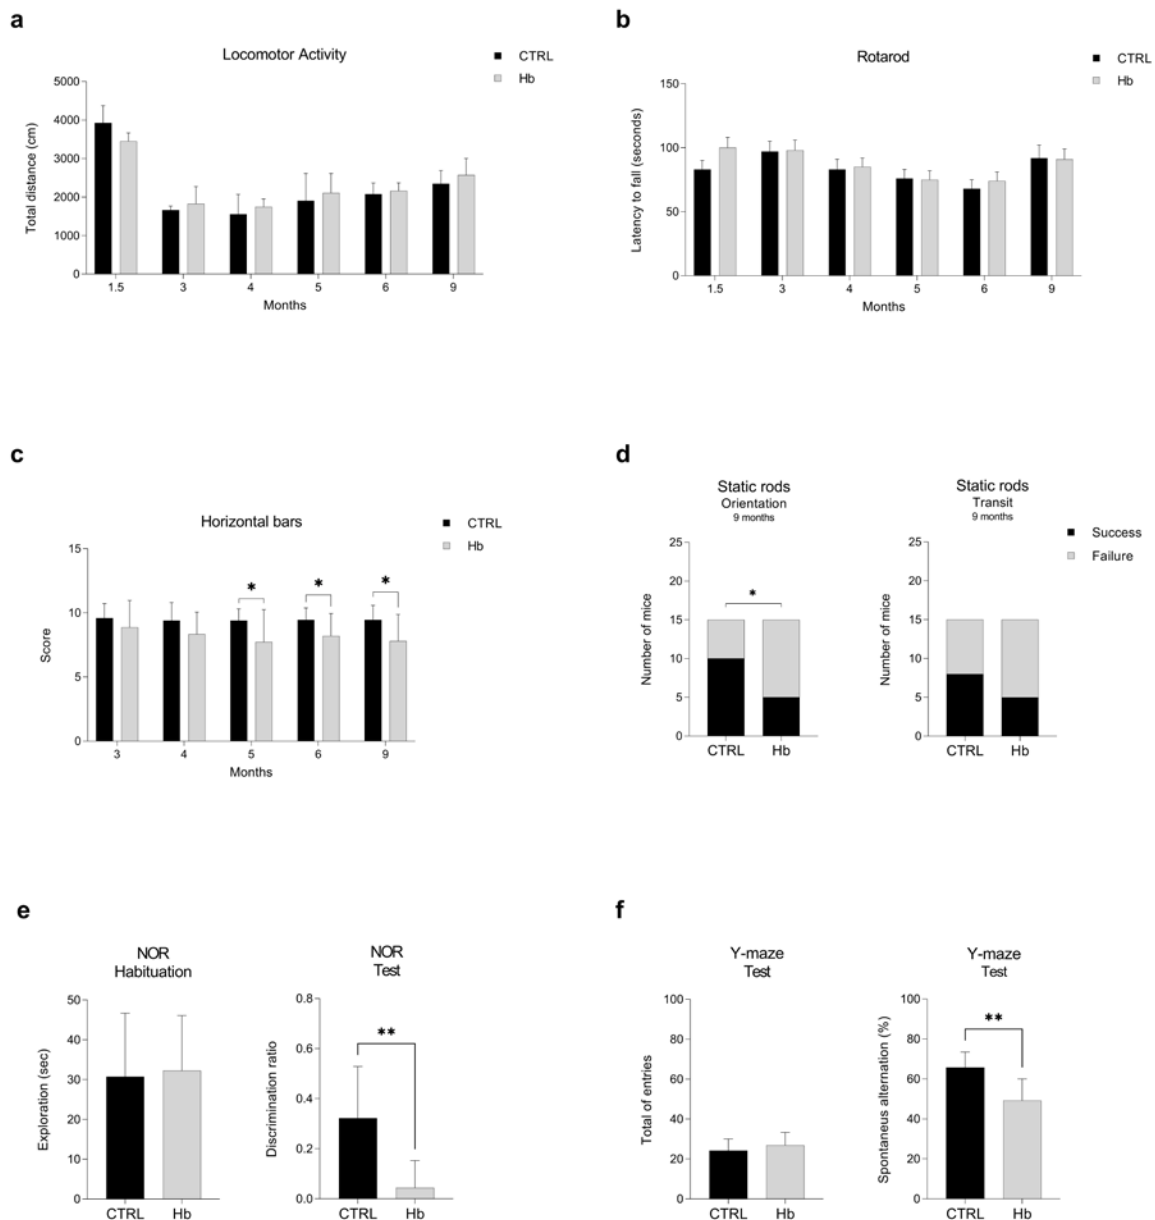

992

993 **Hb overexpression in SNpc decrease motor performances and trigger cognitive impairments.**

994 AAV9-CTRL (n=12) and AAV9-Hb (n=12) were assessed for locomotor activity and total distance (cm)

995 was recorded at different time points after injections (a). AAV9-CTRL (n=15) and AAV9-Hb (n=15) were

996 also scored for motor coordination with the rotarod test (b) and latency to fall was measured. Horizontal

997 bars test as used to assess forelimb strength and coordination (c) and mice were scored for their

998 performance. AAV9-CTRL (n=15) and AAV9-Hb (n=15). Data represent means  $\pm$  SEM. Statistical

999 analysis was performed with unpaired t test with Welch's correction. \*,  $p \leq 0.05$ . AAV9-CTRL (n=15)

1000 and AAV9-Hb (n=15) were assessed in static rods test measuring two parameters, transit time and

1001 orientation time (seconds) and different time points. In panel (d) it is depicted the results at 9 months

1002 after injection. Chi-square test was used to evaluate the success/failure of each group. \*,  $p \leq 0.05$ .  
1003 Novel object recognition test (NOR) was used to evaluate recognition memory (**e**). AAV9-CTRL (n=8)  
1004 and AAV9-Hb (n=8) was habituated to the object for 10 minutes and exploration (seconds) of the objects  
1005 was measured (**e**, *left panel*). After 1 hours, mice were assessed to recognize the novel object and the  
1006 discrimination ration was plotted (**e**, *right panel*). Spontaneous alternation in the Y-maze was used to  
1007 measured spatial working memory in AAV9-CTRL (n=10) and AAV9-Hb (n=12) mice (**f**). Total entries  
1008 were calculated for each group (**f**, *left panel*). Spontaneous alternation % was plotted for each group (**f**,  
1009 *right panel*). Data represent means  $\pm$  SEM. Statistical analysis was performed with unpaired t test with  
1010 Welch's correction. \*,  $p \leq 0.05$ ; \*\*,  $p \leq 0.01$ .
