# Supplementary material for: Neuronal hemoglobin induces loss of dopaminergic neurons in mouse Substantia nigra, cognitive deficits and cleavage of endogenous α-synuclein
Source: bioRxiv or medRxiv preprint supplement (doi:10.1101/2021.10.13.464204), 2022-01-16
Supplement: Supplementary file [file media-1.pdf]

1 **ADDITIONAL INFORMATION:**

2 **Supplementary Figure 1**

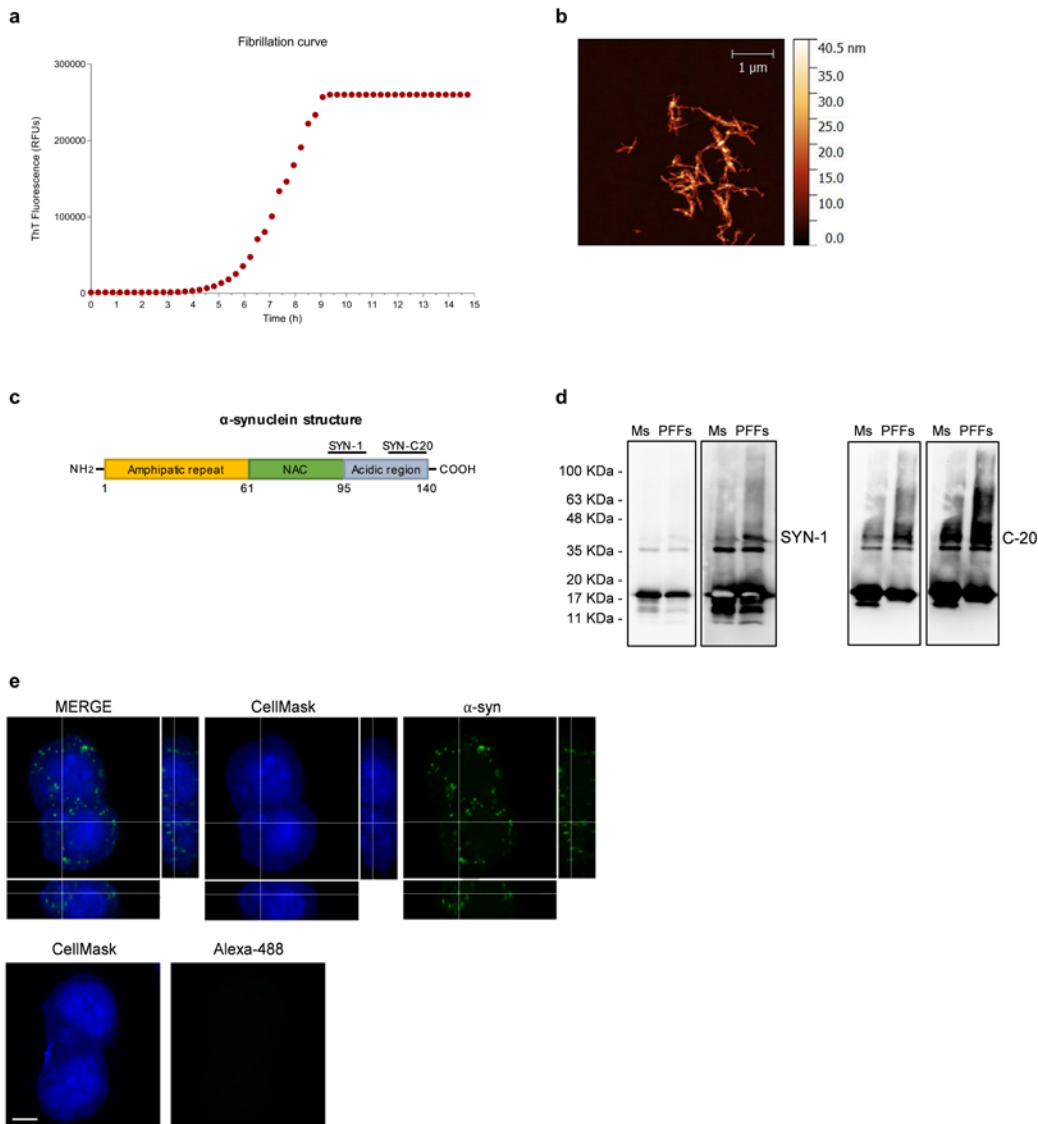

3

4 **Biochemical analysis and structural characterization of  $\alpha$ -syn preparations.** Fibrillation curve of

5 recombinant human  $\alpha$ -syn protein analysed using ThT fluorescence assay. Mean of three wells is

6 represented (a). AFM analysis of fibrillary human  $\alpha$ -syn aggregates after 5 min of sonication (b).

7 Schematic representation of the domains structure of human  $\alpha$ -syn protein and epitopes of anti- $\alpha$ -syn

8 antibodies used for the study (c). Ms and PFFs preparations were analysed by western blot with SYN-

9 1 and C20 antibodies. The same membrane was exposed for a longer period in order to detect high

10 molecular weight species (d). Sonicated  $\alpha$ -syn fibrils internalization after quenching with Trypan Blue.

11 Representative confocal microscopy images of Hb cells treated with Alexa-488 labelled PFFs for 24 h,

12 after Trypan Blue quenching. Cells not incubated with labelled PFFs were used to establish

13 autofluorescence levels. Entire cells were labelled by CellMask (e). Scale bar 10  $\mu$ m.

14 **Supplementary Figure 2**

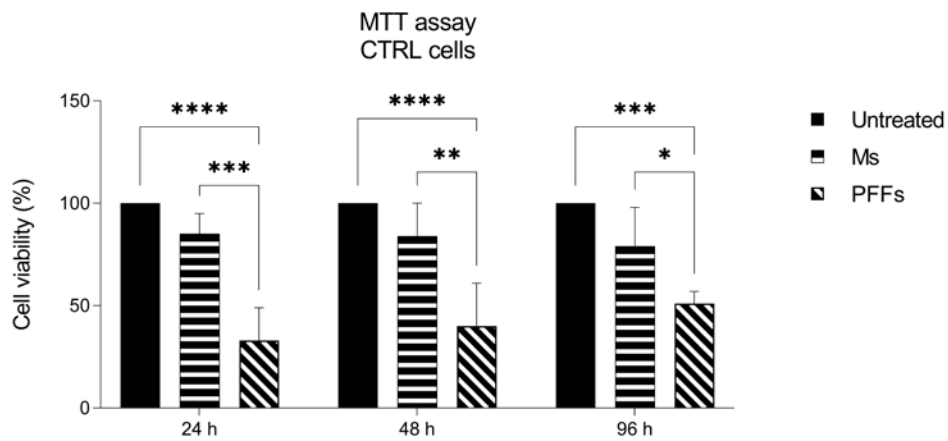

15

16 **Cytotoxicity of  $\alpha$ -syn preparations in iMN9D cells.** Cells were treated with Ms and PFFs preparations  
17 for 24 h, 48 h, 96 h and cell viability was determined by MTT assay. Results are mean  $\pm$  standard  
18 deviation of three independent experiments, each performed in four replicas and are expressed as  
19 percentage of untreated CTRL cells. Statistical analysis was performed with one-way Anova. \*,  $p \leq$   
20 0.05; \*\*,  $p \leq 0.01$ ; \*\*\*,  $p \leq 0.001$ ; \*\*\*\*,  $p \leq 0.0001$ ; ns, not significant.

21

22 **Supplementary Figure 3**

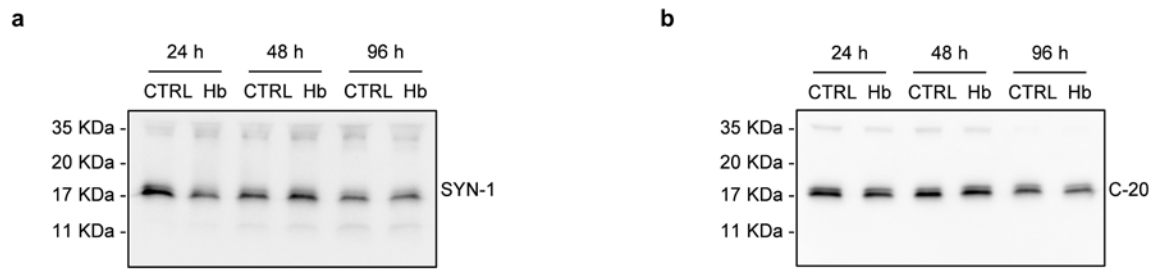

23

24 **C-terminal truncated  $\alpha$ -syn accumulation in the presence of Hb in cell media.** CTRL and Hb cells  
25 were treated with  $\alpha$ -syn amyloids and cell medium were collected at the indicated time points and  
26 analysed by immunoblotting with SYN-1 and C-20 antibodies.

27

28 **Supplementary Figure 4**

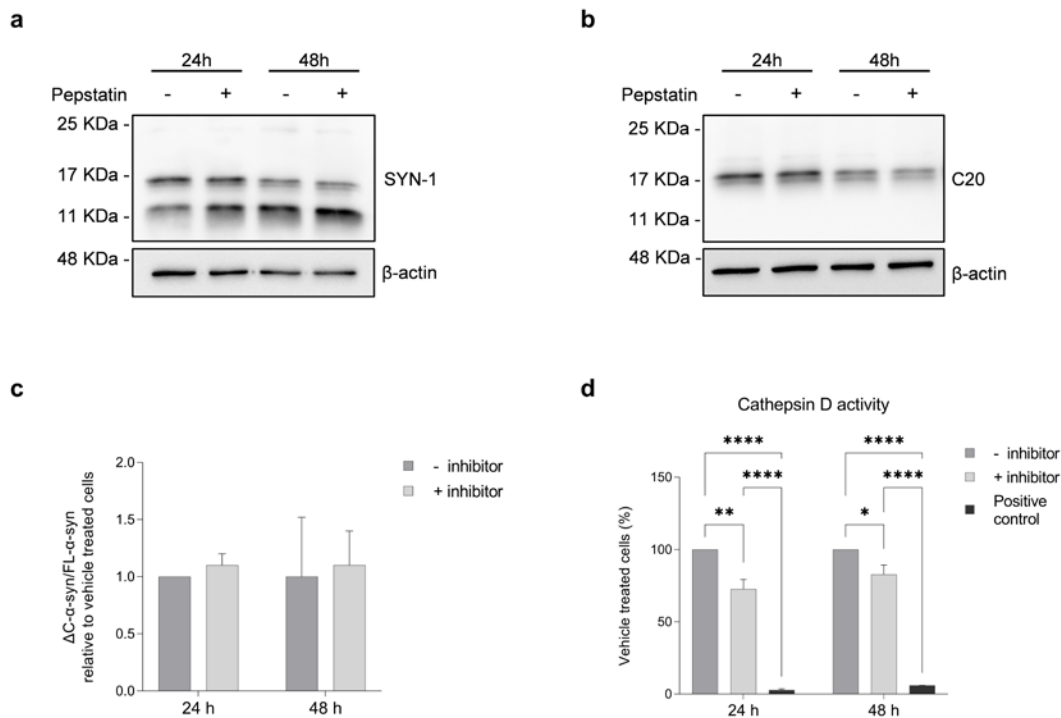

29

30 **Effect of Cathepsin D inhibition on  $\alpha$ -syn C-terminal truncated species accumulation in Hb cells.**

31 Cell lysates of Hb cells treated with DMSO (-) and pepstatin (+) were analysed by immunoblotting with  
 32 SYN-1 (a) and C-20 (b) antibodies. Band intensity corresponding to  $\Delta$ C- $\alpha$ -syn and FL- $\alpha$ -syn was  
 33 quantified and the ratio was calculated. Data represent means  $\pm$  SEM and are representative of five  
 34 independent experiments. Statistical analysis was performed with one-way Anova. \*,  $p \leq 0.05$ ; \*\*,  $p \leq$   
 35  $0.01$ ; \*\*\*,  $p \leq 0.001$ ; \*\*\*\*,  $p \leq 0.0001$ ; ns, not significant (c). Cell lysates of Hb cells treated with DMSO (-  
 36 ) and pepstatin (+) were analysed by Cathepsin D activity assay. Data represent means  $\pm$  SEM and are  
 37 representative of two independent experiments, each performed in three replicas and are expressed as  
 38 percentage of vehicle treated cells. Statistical analysis was performed with one-way Anova. \*,  $p \leq 0.05$ ;  
 39 \*\*,  $p \leq 0.01$ ; \*\*\*,  $p \leq 0.001$ ; \*\*\*\*,  $p \leq 0.0001$ ; ns, not significant (d).

40

41 **Supplementary Figure 5**

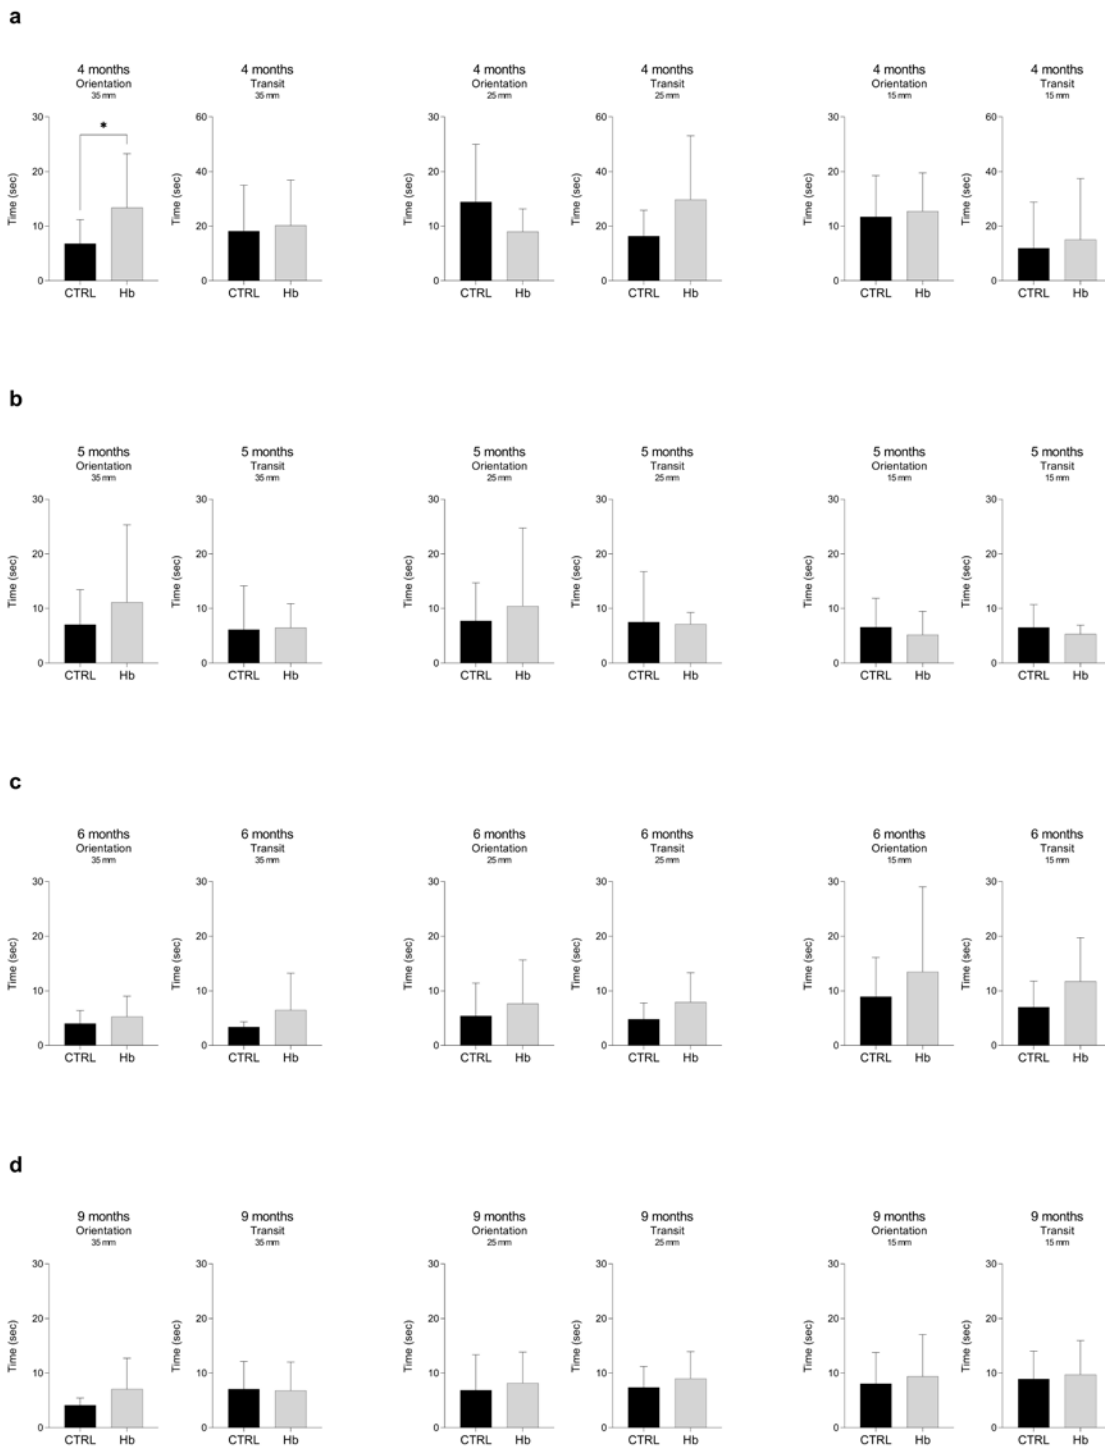

42

43 **Static rods test on AAV9-CTRL and AAV9-Hb mice.** AAV9-CTRL (n=15) and AAV9-Hb (n=15) were  
 44 assessed in static rods test measuring two parameters, transit time and orientation time (seconds) and  
 45 different time points. Different diameters of the rods were used, 35, 25 and 15mm. The time points  
 46 evaluated in this test were 4 (a), 5 (b), 6 (c) and 9 months (d) after injection. Data represent means ±  
 47 SEM. Statistical analysis was performed with unpaired t test with Welch's correction. \*, p ≤ 0.05.

5
